# Supplementary material for: Proteomic analysis of Plasmodium falciparum response to isocryptolepine derivative
Source: PubMed Central journal article supplement (PMC6687117; doi:10.1371/journal.pone.0220871), 2019-08-08
Supplement: pone.0220871.s004.pdf [file pone.0220871.s004.pdf]

**Supplement 4 file. Selection of differential proteins from three biological replicates**

The experiment was performed in three biological replicates.

Protein alteration was selected by the different expression at least in two biological replicates.

| NCBI acc_no  | All_prot_desc                                                                                                        | Mass   | PI    | Score | Coverage | UniProtKB     | Biological Process  | Localization          | ICL-M            |                  |                  |                   |
|--------------|----------------------------------------------------------------------------------------------------------------------|--------|-------|-------|----------|---------------|---------------------|-----------------------|------------------|------------------|------------------|-------------------|
|              |                                                                                                                      |        |       |       |          |               |                     |                       | Rep.1<br>Up/Down | Rep.2<br>Up/Down | Rep.3<br>Up/Down | Select<br>Up/Down |
| gi 23499105  | heat shock protein 70                                                                                                | 73868  | 5.51  | 7020  | 53.8     | Q8IB24_PLAF7  | Unknown             | Cytoplasm             | -                | -                | -                | -                 |
| gi 23505079  | heat shock protein 70                                                                                                | 72343  | 5.18  | 4848  | 51.4     | Q8I2X4_PLAF7  | Unknown             | Endoplasmic Reticulum | -                | -                | -                | -                 |
| gi 124810131 | glyceraldehyde-3-phosphate dehydrogenase                                                                             | 36612  | 7.59  | 3876  | 76.6     | Q8IKK7_PLAF7  | Metabolism          | Cytoplasm             | -                | -                | -                | -                 |
| gi 371941768 | Hsp70-x                                                                                                              | 75006  | 5.59  | 2586  | 24.4     | K7NTP5_PLAF7  | Unknown             | Unknown               | -                | -                | -                | -                 |
| gi 50400239  | RecName: Full=Enolase; AltName: Full=2-phospho-D-glycerate hydro-lyase; AltName: Full=2-phosphoglycerate dehydratase | 48647  | 6.21  | 2933  | 65       | ENO_PLAF7     | Metabolism          | Cytoplasm             | -                | -                | -                | -                 |
| gi 23615698  | elongation factor 1-alpha                                                                                            | 48928  | 9.12  | 2796  | 59.6     | Q8I0P6_PLAF7  | Translation         | Cytoplasm             | -                | -                | -                | -                 |
| gi 23498766  | heat shock protein 90                                                                                                | 86112  | 4.94  | 1977  | 40.4     | Q8IC05_PLAF7  | Protein fate        | Unknown               | -                | -                | -                | -                 |
| gi 46361043  | ornithine aminotransferase                                                                                           | 46205  | 6.47  | 1642  | 40.3     | OAT_PLAF7     | Metabolism          | Cytoplasm             | -                | -                | -                | -                 |
| gi 124803934 | GTP-binding nuclear protein RAN/TC4                                                                                  | 24860  | 7.72  | 1358  | 67.8     | Q7KQK6_PLAF7  | Transport           | Cytoplasm             | -                | Up               | -                | -                 |
| gi 23615406  | L-lactate dehydrogenase                                                                                              | 34086  | 7.12  | 1413  | 48.1     | Q76NM3_PLAF7  | Metabolism          | Unknown               | -                | -                | -                | -                 |
| gi 225632282 | protein disulfide isomerase                                                                                          | 55479  | 5.56  | 1965  | 39.5     | C0H4Y6_PLAF7  | Cell Rescue Defense | Endoplasmic Reticulum | -                | -                | -                | -                 |
| gi 344189571 | Chain A, Phosphoglycerate Kinase                                                                                     | 46264  | 7.82  | 1460  | 70.5     | PGK_PLAF7     | Metabolism          | Unknown               | Up               | -                | -                | -                 |
| gi 129926    | RecName: Full=Phosphoglycerate kinase                                                                                | 45398  | 7.63  | 1460  | 64.7     | PGK_PLAF7     | Metabolism          | Unknown               | -                | -                | -                | -                 |
| gi 74920225  | RecName: Full=Fructose-bisphosphate aldolase                                                                         | 40080  | 8.33  | 1103  | 64       | ALF_PLAF7     | Metabolism          | Cytoplasm             | -                | -                | Up               | -                 |
| gi 124803500 | histone H2B                                                                                                          | 13117  | 10.27 | 1304  | 74.4     | Q8IIV1_PLAF7  | Nucleosome Assembly | Nucleus               | Down             | Up               | -                | -                 |
| gi 31505529  | histone H4, partial                                                                                                  | 11448  | 11.23 | 1401  | 67       | Q8IIV2_PLAF7  | Nucleosome Assembly | Nucleus               | -                | Up               | -                | -                 |
| gi 124809712 | elongation factor 2                                                                                                  | 93462  | 6.36  | 1337  | 31.3     | Q8IKW5_PLAF7  | Unknown             | Unknown               | -                | -                | -                | -                 |
| gi 23498286  | 40S ribosomal protein S19                                                                                            | 19710  | 10.17 | 876   | 62.9     | Q8IFP2_PLAF7  | Translation         | Cytoplasm             | Down             | -                | -                | -                 |
| gi 23505200  | merozoite surface protein 1                                                                                          | 195605 | 6.11  | 910   | 20.6     | Q8I0U8_PLAF7  | Pathogenesis        | Membrane              | -                | -                | -                | -                 |
| gi 225632253 | 14-3-3 protein                                                                                                       | 30174  | 4.86  | 622   | 52.7     | C0H4V6_PLAF7  | Unknown             | Cytoplasm             | -                | -                | -                | -                 |
| gi 124806075 | endoplasmic reticulum protein, putative                                                                              | 94959  | 5.28  | 1054  | 37.1     | Q8I0V4_PLAF7  | Protein fate        | Endoplasmic Reticulum | -                | -                | -                | -                 |
| gi 46361058  | histone H3                                                                                                           | 15437  | 11.14 | 691   | 51.5     | C6KSV0_PLAF7  | Nucleosome Assembly | Nucleus               | -                | -                | -                | -                 |
| gi 124804377 | 60S ribosomal protein P0                                                                                             | 34945  | 6.28  | 514   | 50.9     | Q8I161_PLAF7  | Translation         | Cytoplasm             | -                | -                | -                | -                 |
| gi 124802054 | DNA/RNA-binding protein Alba 3                                                                                       | 11969  | 9.3   | 415   | 92.5     | Q8I1X8_PLAF7  | Unknown             | Nucleus               | -                | -                | Up               | -                 |
| gi 23498886  | 40S ribosomal protein S5, putative                                                                                   | 21849  | 9.67  | 505   | 45.1     | Q8IBN5_PLAF7  | Translation         | Cytoplasm             | -                | Up               | Down             | -                 |
| gi 303324901 | Chain A, Heat Shock Protein 86                                                                                       | 25195  | 4.85  | 470   | 32.7     | Q8IC05_PLAF7  | Protein fate        | Unknown               | Down             | Up               | -                | -                 |
| gi 23615568  | phosphoethanolamine N-methyltransferase                                                                              | 31024  | 5.43  | 637   | 50.4     | Q8IDQ9_PLAF7  | Metabolism          | Golgi Apparatus       | -                | -                | -                | -                 |
| gi 23499152  | DNA/RNA-binding protein Alba 1                                                                                       | 27242  | 10.58 | 409   | 42.3     | Q8IAX8_PLAF7  | Unknown             | Cytoplasm             | -                | -                | Down             | -                 |
| gi 4493980   | peptidyl-prolyl cis-trans isomerase                                                                                  | 18940  | 8.29  | 444   | 50.3     | Q76NN7_PLAF7  | Protein fate        | Cytoplasm             | -                | -                | -                | -                 |
| gi 225631678 | 60S ribosomal protein L12, putative                                                                                  | 18101  | 9.54  | 373   | 58.8     | Q8I3T8_PLAF7  | Translation         | Cytoplasm             | -                | -                | -                | -                 |
| gi 23504519  | actin-depolymerizing factor 1                                                                                        | 13732  | 7.66  | 649   | 59       | CAD1F1_PLAF7  | Cytoskeleton        | Cytoplasm             | Up               | -                | -                | -                 |
| gi 4494010   | histone H2A variant, putative                                                                                        | 16443  | 10.63 | 486   | 32.3     | O97320_PLAF7  | Nucleosome Assembly | Nucleus               | -                | -                | Down             | -                 |
| gi 225631753 | cell division cycle protein 48 homologue, putative                                                                   | 92329  | 4.95  | 420   | 28.4     | C6KT34_PLAF7  | Cell Cycle          | Unknown               | -                | -                | Down             | -                 |
| gi 124803860 | peptidyl-prolyl cis-trans isomerase                                                                                  | 21717  | 7.1   | 343   | 69.2     | Q8IKK8_PLAF7  | Protein fate        | Unknown               | -                | -                | -                | -                 |
| gi 124802119 | adenylate kinase                                                                                                     | 27594  | 8.97  | 351   | 46.3     | Q8I1V6_PLAF7  | Metabolism          | Cytoplasm             | -                | -                | -                | -                 |
| gi 46361129  | histone H2A                                                                                                          | 14114  | 10.29 | 397   | 48.5     | C6KT18_PLAF7  | Nucleosome Assembly | Nucleus               | -                | -                | -                | -                 |
| gi 23499115  | high mobility group protein B2                                                                                       | 11527  | 9.97  | 290   | 42.4     | Q8IB14_PLAF7  | Transcription       | Nucleus               | -                | -                | -                | -                 |
| gi 75009812  | RecName: Full=Triosephosphate isomerase; Short=TIM; AltName: Full=Triose-phosphate isomerase                         | 27917  | 6.01  | 409   | 36.3     | TPIS_PLAF7    | Metabolism          | Cytoplasm             | -                | -                | -                | -                 |
| gi 23505159  | conserved Plasmodium protein, unknown function                                                                       | 24683  | 5.49  | 298   | 47.9     | Q8I2Q0_PLAF7  | Unknown             | Unknown               | -                | -                | -                | -                 |
| gi 258597456 | nucleosome assembly protein                                                                                          | 40463  | 4.76  | 416   | 17       | Q8I608_PLAF7  | Nucleosome Assembly | Cytoplasm             | -                | Down             | -                | -                 |
| gi 23504687  | 40S ribosomal protein S9, putative                                                                                   | 22109  | 10.45 | 237   | 45.5     | Q8I3R0_PLAF7  | Translation         | Cytoplasm             | Down             | Up               | -                | -                 |
| gi 23504938  | alpha tubulin 1                                                                                                      | 50264  | 4.93  | 234   | 23.8     | Q6ZLZ9_PLAF7  | Cytoskeleton        | Cytoplasm             | Down             | Down             | Down             | Down              |
| gi 23504556  | 60S ribosomal protein L4                                                                                             | 46183  | 10.5  | 268   | 34.3     | Q8I431_PLAF7  | Translation         | Cytoplasm             | -                | Down             | Down             | Down              |
| gi 124810348 | exported protein 2                                                                                                   | 33391  | 5.1   | 229   | 24.4     | Q8IKC8_PLAF7  | Unknown             | Membrane              | -                | Down             | -                | -                 |
| gi 124808771 | 60S ribosomal protein L5, putative                                                                                   | 33977  | 9.78  | 223   | 21.1     | Q8I1L3_PLAF7  | Translation         | Cytoplasm             | -                | -                | Down             | -                 |
| gi 74876423  | RecName: Full=Tubulin beta chain; AltName: Full=beta-tubulin                                                         | 49719  | 4.73  | 389   | 44.3     | TBB_PLAF7     | Cytoskeleton        | Cytoplasm             | -                | -                | -                | -                 |
| gi 11127605  | heat shock protein hsp70 homologue Pfhs70-3                                                                          | 71546  | 5.9   | 410   | 33.2     | Q9GUX1_PLAFA  | Protein fate        | Unknown               | Down             | -                | -                | -                 |
| gi 124805478 | eukaryotic translation initiation factor 5A                                                                          | 17620  | 5.42  | 222   | 66.5     | Q8I603_PLAF7  | Translation         | Unknown               | -                | Up               | -                | -                 |
| gi 225631960 | 40S ribosomal protein S19                                                                                            | 16753  | 10.27 | 351   | 38.6     | C0H5C2_PLAF7  | Translation         | Cytoplasm             | -                | -                | Down             | -                 |
| gi 124808810 | 60S ribosomal protein L21                                                                                            | 18783  | 10.04 | 477   | 37.3     | Q8I1K3_PLAF7  | Translation         | Cytoplasm             | -                | -                | -                | -                 |
| gi 23504648  | 40S ribosomal protein S11                                                                                            | 16067  | 10.49 | 236   | 58.3     | Q8I3U6_PLAF7  | Translation         | Cytoplasm             | -                | Up               | -                | -                 |
| gi 23615723  | 40S ribosomal protein S15                                                                                            | 17240  | 10.38 | 195   | 59.6     | Q8IDB0_PLAF7  | Translation         | Cytoplasm             | -                | Up               | -                | -                 |
| gi 124804238 | 40S ribosomal protein S18, putative                                                                                  | 17880  | 10.46 | 261   | 49.4     | Q8IIA2_PLAF7  | Translation         | Cytoplasm             | -                | -                | -                | -                 |
| gi 258596854 | stevor                                                                                                               | 34204  | 8.76  | 180   | 15.4     | O96118_PLAF7  | Cell Surface        | Membrane              | -                | -                | -                | -                 |
| gi 23615606  | DNA/RNA-binding protein Alba 4                                                                                       | 42133  | 7.14  | 174   | 25.8     | Q8IDM3_PLAF7  | Unknown             | Cytoplasm             | -                | -                | -                | -                 |
| gi 23504494  | mature parasite-infected erythrocyte surface antigen                                                                 | 168186 | 4.76  | 275   | 17.6     | Q8I492_PLAF7  | Unknown             | Membrane              | -                | -                | -                | -                 |
| gi 23504618  | purine nucleoside phosphorylase                                                                                      | 26841  | 6.07  | 261   | 42.9     | Q8I3X4_PLAF7  | Metabolism          | Unknown               | Down             | Up               | -                | -                 |
| gi 282403624 | Chain A, Uridine Phosphorylase, Putative                                                                             | 30453  | 5.83  | 205   | 36.2     | Q8I3X4_PLAF7  | Metabolism          | Unknown               | -                | -                | Down             | -                 |
| gi 225631740 | 60S ribosomal protein L19                                                                                            | 21566  | 11.32 | 168   | 14.3     | C6KSY6_PLAF7  | Translation         | Cytoplasm             | -                | Down             | Down             | Down              |
| gi 46361130  | histone H3 variant, putative                                                                                         | 15432  | 11.15 | 236   | 47.1     | C6KT19_PLAF7  | Nucleosome Assembly | Nucleus               | -                | -                | -                | -                 |
| gi 124805752 | glutathione peroxidase-like thioredoxin peroxidase                                                                   | 23937  | 8.99  | 305   | 35.6     | Q8I5T2_PLAF7  | Protein fate        | Apicoplast            | Up               | -                | -                | -                 |
| gi 124810293 | eukaryotic initiation factor 4A                                                                                      | 45281  | 5.48  | 409   | 36.2     | Q8IKF0_PLAF7  | Translation         | Cytoplasm             | -                | Up               | Down             | -                 |
| gi 7768287   | formate-nitrite transporter                                                                                          | 34436  | 8.74  | 194   | 19.7     | O77389_PLAF7  | Transport           | Membrane              | -                | -                | Up               | -                 |
| gi 124801997 | 60S ribosomal protein L13, putative                                                                                  | 23739  | 10.19 | 207   | 37.1     | Q8IJZ7_PLAF7  | Translation         | Cytoplasm             | -                | -                | Down             | -                 |
| gi 124808442 | 60S ribosomal protein L10, putative                                                                                  | 25200  | 9.97  | 320   | 40.6     | Q8I1V2_PLAF7  | Translation         | Cytoplasm             | -                | -                | Down             | -                 |
| gi 124800689 | knob-associated histidine-rich protein                                                                               | 71259  | 9.17  | 309   | 15       | Q9TY99_PLAF7  | Unknown             | Cytoplasm             | -                | -                | -                | -                 |
| gi 124804166 | splicing factor, putative                                                                                            | 16002  | 5.1   | 365   | 37.9     | Q8IIIC4_PLAF7 | Transcription       | Nucleus               | -                | -                | -                | -                 |
| gi 124809606 | 40S ribosomal protein S5                                                                                             | 29939  | 10.02 | 270   | 42.3     | Q8I1O2_PLAF7  | Translation         | Cytoplasm             | -                | -                | -                | -                 |
| gi 23504496  | Plasmodium exported protein, unknown function                                                                        | 30696  | 9.47  | 147   | 13.1     | Q8I490_PLAF7  | Unknown             | Membrane              | -                | Down             | -                | -                 |
| gi 124803848 | cysteine proteinase falcipain 2b                                                                                     | 55768  | 8.14  | 246   | 26.6     | Q8I6U5_PLAF7  | Metabolism          | Food Vacuole          | -                | Up               | -                | -                 |
| gi 124803863 | cysteine proteinase falcipain 2a                                                                                     | 55892  | 7.12  | 246   | 22.7     | Q8I6U4_PLAF7  | Metabolism          | Food Vacuole          | -                | -                | -                | -                 |
| gi 23615388  | 60S ribosomal protein L6, putative                                                                                   | 21588  | 9.88  | 142   | 37.4     | Q8IE85_PLAF7  | Translation         | Cytoplasm             | -                | Down             | -                | -                 |
| gi 237640532 | Chain A, HAP protein                                                                                                 | 37376  | 4.97  | 141   | 32.2     | Q8IM15_PLAF7  | Metabolism          | Food Vacuole          | Down             | Down             | Down             | Down              |
| gi 23504595  | histamine-releasing factor                                                                                           | 19967  | 4.58  | 210   | 23.4     | TCTP_PLAF7    | Cell Cycle          | Cytoplasm             | Up               | Up               | -                | Up                |
| gi 46361220  | pyruvate kinase                                                                                                      | 55625  | 7.5   | 405   | 44.8     | C6KTA4_PLAF7  | Metabolism          | Cytoplasm             | Down             | Up               | Up               | Up                |
| gi 8247298   | hypothetical protein, partial                                                                                        | 4755   | 9.23  | 159   | 60       | Q9NFH5_PLAFA  | Unknown             | Unknown               | Down             | -                | Down             | Down              |
| gi 258549116 | serine esterase, putative                                                                                            | 216941 | 8.82  | 134   | 18.7     | C6S3F2_PLAF7  | Metabolism          | Unknown               | -                | -                | -                | -                 |
| gi 46361040  | proteasome subunit alpha type-2, putative                                                                            | 26512  | 5.4   | 185   | 14.9     | C6KST3_PLAF7  | Protein fate        | Cytoplasm             | -                | -                | -                | -                 |

|              |                                                                                                                                             |        |       |     |      |               |                     |                       |      |      |      |      |
|--------------|---------------------------------------------------------------------------------------------------------------------------------------------|--------|-------|-----|------|---------------|---------------------|-----------------------|------|------|------|------|
| gi 75016040  | RecName: Full=Acidic leucine-rich nuclear phosphoprotein 32-related protein; AltName: Full=ANP32/acidic nuclear phosphoprotein-like protein | 32986  | 4.27  | 177 | 24.2 | AN32_PLAF7    | Nucleosome Assembly | Nucleus               | -    | -    | -    | -    |
| gi 124803852 | cysteine proteinase falcipain 3                                                                                                             | 56630  | 6.59  | 131 | 26   | Q8II0_PLAF7   | Metabolism          | Food Vacuole          | Up   | -    | -    | -    |
| gi 268612503 | Chain A, Phosphoglycerate mutase                                                                                                            | 29716  | 8.26  | 247 | 41.9 | Q8II66_PLAF7  | Metabolism          | Cytoplasm             | -    | -    | -    | -    |
| gi 124804024 | phosphoglycerate mutase, putative                                                                                                           | 28752  | 8.3   | 247 | 57.6 | Q8II66_PLAF7  | Metabolism          | Cytoplasm             | -    | -    | -    | -    |
| gi 93278503  | Chain A, Falcipain 2                                                                                                                        | 27140  | 4.98  | 124 | 32   | Q9N658_PLAFA  | Unknown             | Membrane              | Down | -    | -    | -    |
| gi 23499154  | 60S ribosomal protein L13-2, putative                                                                                                       | 25425  | 10.78 | 123 | 30.2 | Q8IAX6_PLAF7  | Translation         | Cytoplasm             | Down | Down | Down | Down |
| gi 124809152 | mitochondrial acidic protein MAM33, putative                                                                                                | 28854  | 4.89  | 172 | 29.4 | Q8ILB6_PLAF7  | Unknown             | Mitochondria          | -    | -    | -    | -    |
| gi 124808201 | 40S ribosomal protein S8e, putative                                                                                                         | 25035  | 9.98  | 262 | 28   | Q8IM10_PLAF7  | Translation         | Cytoplasm             | -    | -    | Down | -    |
| gi 23504955  | high molecular weight rhostry protein 3                                                                                                     | 104789 | 6.25  | 150 | 21.4 | Q8I395_PLAF7  | Invasion            | Cytoplasm             | Down | Up   | Down | Down |
| gi 23615526  | 60S ribosomal protein L6-2, putative                                                                                                        | 25516  | 10.1  | 222 | 26.7 | Q8IDV1_PLAF7  | Translation         | Cytoplasm             | -    | Down | Down | Down |
| gi 23499261  | 1-cys peroxiredoxin                                                                                                                         | 25148  | 6.31  | 155 | 47.3 | Q8IAM2_PLAF7  | Cell Rescue Defense | Cytoplasm             | Down | Down | Down | Down |
| gi 23615644  | 60S ribosomal protein L17, putative                                                                                                         | 23400  | 10.89 | 109 | 36.5 | Q8IDIS_PLAF7  | Translation         | Cytoplasm             | Down | -    | -    | -    |
| gi 4493906   | 40S ribosomal protein S12, putative                                                                                                         | 15387  | 4.9   | 192 | 60.3 | RS12_PLAF7    | Translation         | Cytoplasm             | -    | -    | -    | -    |
| gi 46361162  | pyridoxine biosynthesis protein PDX1                                                                                                        | 32992  | 6.76  | 314 | 55.1 | PDX1_PLAF7    | Metabolism          | Cytoplasm             | Up   | -    | Down | -    |
| gi 124802718 | adenosine deaminase                                                                                                                         | 42438  | 5.41  | 231 | 41.7 | Q8IIA9_PLAF7  | Metabolism          | Cytoplasm             | -    | Down | Up   | -    |
| gi 124809201 | glucose-6-phosphate isomerase                                                                                                               | 67325  | 6.78  | 172 | 23.1 | Q8IIA4_PLAF7  | Metabolism          | Unknown               | -    | -    | Down | -    |
| gi 124806612 | conserved protein, unknown function                                                                                                         | 23644  | 9.64  | 139 | 25.2 | Q8I546_PLAF7  | Unknown             | Unknown               | Down | -    | -    | -    |
| gi 23504725  | karyopherin beta                                                                                                                            | 127272 | 4.8   | 141 | 14.1 | Q8I3M5_PLAF7  | Transport           | Cytoplasm             | Down | Up   | -    | -    |
| gi 258597720 | 60S ribosomal protein L7-3, putative                                                                                                        | 32661  | 10.17 | 97  | 20.5 | Q8IILL2_PLAF7 | Translation         | Cytoplasm             | -    | -    | Up   | -    |
| gi 23499195  | acyl-CoA binding protein, putative                                                                                                          | 10768  | 7.68  | 193 | 62.2 | Q8IAT5_PLAF7  | Unknown             | Unknown               | -    | -    | -    | -    |
| gi 23505219  | profilin, putative                                                                                                                          | 19005  | 4.22  | 98  | 18.7 | PROF_PLAF7    | Cytoskeleton        | Cytoplasm             | -    | Down | -    | -    |
| gi 23615603  | nucleoside transporter 1                                                                                                                    | 47600  | 8.36  | 135 | 12.6 | Q8IDM6_PLAF7  | Transport           | Membrane              | -    | Up   | Down | -    |
| gi 23498814  | histone H2B variant                                                                                                                         | 13755  | 10.8  | 209 | 74.8 | Q8IBV7_PLAF7  | Nucleosome Assembly | Nucleus               | -    | Up   | -    | -    |
| gi 18076407  | early transcribed membrane protein 14.1                                                                                                     | 11420  | 9.63  | 93  | 20.6 | Q7KQM5_PLAF7  | Unknown             | Membrane              | -    | -    | -    | -    |
| gi 124809402 | 60S ribosomal protein L1, putative                                                                                                          | 24790  | 9.85  | 127 | 43.8 | Q8IL58_PLAF7  | Translation         | Cytoplasm             | -    | Up   | -    | -    |
| gi 23615172  | 40S ribosomal protein S7, putative                                                                                                          | 22467  | 9.81  | 266 | 41.8 | Q8IET7_PLAF7  | Translation         | Cytoplasm             | Down | -    | Down | Down |
| gi 124802670 | 60S ribosomal protein L3                                                                                                                    | 44193  | 10.21 | 89  | 29.3 | Q8II66_PLAF7  | Translation         | Cytoplasm             | Down | Down | Down | Down |
| gi 23615551  | 60S ribosomal protein L18, putative                                                                                                         | 21733  | 10.62 | 88  | 45.1 | Q8ID56_PLAF7  | Translation         | Cytoplasm             | Down | Up   | Up   | Up   |
| gi 258597310 | 60S ribosomal protein L35, putative                                                                                                         | 14739  | 10.79 | 87  | 32.3 | Q8IIB4_PLAF7  | Translation         | Cytoplasm             | Down | -    | -    | -    |
| gi 23615654  | thioredoxin-related protein, putative                                                                                                       | 23972  | 9.44  | 134 | 26.9 | Q8IDH5_PLAF7  | Cell Rescue Defense | Membrane              | Down | Up   | Down | Down |
| gi 124802073 | single-strand telomeric DNA-binding protein GBP2, putative                                                                                  | 29512  | 9.2   | 136 | 26.4 | Q8IIX3_PLAF7  | Unknown             | Unknown               | -    | -    | -    | -    |
| gi 23615715  | HVA22-like protein, putative                                                                                                                | 18410  | 9.34  | 91  | 37.3 | Q8IDB8_PLAF7  | Unknown             | Membrane              | -    | -    | -    | -    |
| gi 258597201 | 40S ribosomal protein S4, putative                                                                                                          | 29753  | 10.09 | 193 | 41.4 | Q8IIU8_PLAF7  | Translation         | Cytoplasm             | -    | -    | -    | -    |
| gi 124810210 | 40S ribosomal protein S3                                                                                                                    | 24652  | 10.2  | 144 | 33.5 | Q8IKH8_PLAF7  | Translation         | Nucleus               | -    | -    | Down | -    |
| gi 23498182  | V-type proton ATPase subunit B                                                                                                              | 55753  | 5.46  | 106 | 32.4 | Q6ZMA8_PLAF7  | Metabolism          | Cytoplasm             | -    | -    | Up   | -    |
| gi 23498728  | Plasmodium exported protein, unknown function                                                                                               | 27656  | 8.55  | 95  | 28.9 | Q8IC42_PLAF7  | Unknown             | Cytoplasm             | -    | -    | Down | -    |
| gi 124810024 | conserved Plasmodium protein, unknown function                                                                                              | 40043  | 9.6   | 83  | 15   | Q8IKN7_PLAF7  | Unknown             | Unknown               | -    | Down | -    | -    |
| gi 7672213   | eukaryotic translation initiation factor 3 subunit K, putative                                                                              | 28017  | 5.61  | 92  | 31.1 | Q9NFE6_PLAF7  | Translation         | Cytoplasm             | Up   | Down | Up   | Up   |
| gi 23498233  | small GTP-binding protein sar1                                                                                                              | 22006  | 6.75  | 72  | 31.3 | Q8II50_PLAF7  | Transport           | Endoplasmic Reticulum | Down | -    | Down | Down |
| gi 46576603  | RecName: Full=Probable cathepsin C; Flags: Precursor                                                                                        | 80361  | 5.82  | 107 | 23.1 | CATC_PLAF7    | Metabolism          | Food Vacuole          | -    | -    | -    | -    |
| gi 23498770  | heat shock protein 110                                                                                                                      | 99902  | 5.54  | 297 | 24.1 | Q8IC01_PLAF7  | Unknown             | Cytoplasm             | -    | Up   | -    | -    |
| gi 23498142  | Plasmodium exported protein (PHISa), unknown function                                                                                       | 49713  | 9.51  | 126 | 15.2 | Q8I206_PLAF7  | Unknown             | Membrane              | -    | -    | -    | -    |
| gi 23505019  | falstatin                                                                                                                                   | 46929  | 6.22  | 66  | 16.7 | Q8I333_PLAF7  | Invasion            | Cytoplasm             | -    | Down | Up   | -    |
| gi 124802973 | ADP/ATP transporter on adenylate translocase                                                                                                | 33705  | 9.68  | 66  | 26.2 | Q8IIJ4_PLAF7  | Transport           | Membrane              | -    | -    | Down | -    |
| gi 124810483 | proteasome subunit alpha type-1, putative                                                                                                   | 28819  | 5.51  | 192 | 24   | Q8IK90_PLAF7  | Protein fate        | Cytoplasm             | -    | Up   | Up   | Up   |
| gi 23615786  | ubiquitin-60S ribosomal protein L40                                                                                                         | 14608  | 9.91  | 172 | 52.3 | Q8ID50_PLAF7  | Translation         | Cytoplasm             | -    | Down | -    | -    |
| gi 46361167  | nascent polypeptide-associated complex subunit alpha, putative                                                                              | 20610  | 4.77  | 95  | 31.5 | C6KT55_PLAF7  | Translation         | Cytoplasm             | -    | Down | -    | -    |
| gi 124804546 | conserved Plasmodium protein, unknown function                                                                                              | 28478  | 8.8   | 71  | 22   | Q8I111_PLAF7  | Unknown             | Unknown               | -    | -    | -    | -    |
| gi 23504696  | S-adenosyl-L-homocysteine hydrolase                                                                                                         | 53804  | 5.64  | 81  | 30.5 | SAHH_PLAF7    | Metabolism          | Cytoplasm             | -    | Down | -    | -    |
| gi 258597663 | nuclear transport factor 2, putative                                                                                                        | 14428  | 5.53  | 62  | 48   | Q8ILX1_PLAF7  | Transport           | Cytoplasm             | Down | -    | -    | -    |
| gi 23498140  | Plasmodium exported protein (PHISb), unknown function                                                                                       | 60233  | 8.76  | 142 | 22.3 | Q8I207_PLAF7  | Unknown             | Membrane              | Up   | -    | Down | -    |
| gi 3122763   | RecName: Full=60S acidic ribosomal protein P2                                                                                               | 11941  | 4.49  | 115 | 88.4 | RLA2_PLAF7    | Translation         | Cytoplasm             | Up   | -    | -    | -    |
| gi 23504501  | rhostry-associated protein 3                                                                                                                | 46974  | 8.66  | 60  | 17   | Q8I485_PLAF7  | Unknown             | Rhoptry               | Down | -    | Up   | -    |
| gi 124802223 | hypoxanthine-guanine phosphoribosyltransferase                                                                                              | 26346  | 7.59  | 73  | 30.3 | Q8IUS1_PLAF7  | Metabolism          | Cytoplasm             | -    | -    | -    | -    |
| gi 23615498  | merozoite surface protein 7                                                                                                                 | 41251  | 4.74  | 146 | 18.5 | Q8IDX8_PLAF7  | Invasion            | Membrane              | -    | -    | Up   | -    |
| gi 23498881  | conserved Plasmodium protein, unknown function                                                                                              | 29231  | 8.76  | 80  | 19.3 | Q8IBP0_PLAF7  | Unknown             | Unknown               | -    | -    | Down | -    |
| gi 124801947 | RNA-binding protein, putative                                                                                                               | 30033  | 10.07 | 55  | 35.1 | Q8IK12_PLAF7  | Unknown             | Unknown               | -    | Down | Down | Down |
| gi 124809822 | 6-phosphogluconate dehydrogenase, decarboxylating, putative                                                                                 | 52960  | 6.58  | 55  | 21.2 | Q8IKT2_PLAF7  | Metabolism          | Unknown               | -    | -    | -    | -    |
| gi 124804373 | 60S ribosomal protein L38                                                                                                                   | 10307  | 10.71 | 100 | 58.6 | Q8II62_PLAF7  | Translation         | Cytoplasm             | Up   | Up   | Up   | Up   |
| gi 23615340  | conserved Plasmodium protein, unknown function                                                                                              | 88519  | 9.07  | 51  | 16.6 | Q8IEC9_PLAF7  | Unknown             | Unknown               | -    | Down | -    | -    |
| gi 258597482 | 10 kDa chaperonin                                                                                                                           | 11143  | 5.47  | 100 | 43.7 | Q8ISQ3_PLAF7  | Protein fate        | Mitochondria          | Up   | -    | -    | -    |
| gi 23505090  | nucleosome assembly protein                                                                                                                 | 31807  | 4.17  | 131 | 24.2 | Q8I2W3_PLAF7  | Nucleosome Assembly | Cytoplasm             | -    | Up   | Up   | Up   |
| gi 124803892 | folate transporter 2                                                                                                                        | 51321  | 8.63  | 49  | 12.3 | Q8IIK1_PLAF7  | Unknown             | Membrane              | -    | Up   | Down | -    |
| gi 4494003   | 40S ribosomal protein S3A, putative                                                                                                         | 30028  | 9.8   | 55  | 33.2 | RS3A_PLAF7    | Translation         | Cytoplasm             | Down | Down | -    | Down |
| gi 23504974  | ATP-dependent protease ATPase subunit ClpY                                                                                                  | 106396 | 8.42  | 48  | 17.4 | Q8I377_PLAF7  | Unknown             | Cytoplasm             | -    | Up   | Up   | Up   |
| gi 46361227  | protein DJ-1                                                                                                                                | 20280  | 6.95  | 182 | 36.5 | C6KTB1_PLAF7  | Metabolism          | Cytoplasm             | -    | Down | -    | -    |
| gi 23615478  | 20 kDa chaperonin                                                                                                                           | 29045  | 7.63  | 116 | 28.7 | Q8IDZ8_PLAF7  | Protein fate        | Apicoplast            | -    | -    | -    | -    |
| gi 23504603  | inositol-3-phosphate synthase                                                                                                               | 69069  | 7.11  | 114 | 27.6 | Q8I3Y8_PLAF7  | Metabolism          | Cytoplasm             | -    | -    | -    | -    |
| gi 23499218  | ras-related protein Rab-18                                                                                                                  | 23148  | 8.11  | 63  | 17.9 | Q7K6B0_PLAF7  | Transport           | Golgi Apparatus       | -    | Up   | Down | -    |
| gi 124806534 | serine hydroxymethyltransferase                                                                                                             | 49749  | 8.29  | 103 | 31   | Q8I566_PLAF7  | Metabolism          | Cytoplasm             | Up   | Up   | -    | Up   |
| gi 651207688 | Chain A, Serine Hydroxymethyltransferase                                                                                                    | 54007  | 7.21  | 103 | 33.1 | Q8I566_PLAF7  | Metabolism          | Cytoplasm             | Up   | -    | -    | -    |
| gi 23504681  | 40S ribosomal protein S24                                                                                                                   | 15382  | 10.75 | 54  | 21.1 | Q8I3R6_PLAF7  | Translation         | Cytoplasm             | -    | Up   | -    | -    |
| gi 8052274   | elongation factor 1 (EF-1), putative                                                                                                        | 17695  | 4.5   | 63  | 16.7 | Q97319_PLAF7  | Translation         | Cytoplasm             | -    | Up   | -    | -    |
| gi 124803623 | endoplasmic reticulum-resident calcium binding protein                                                                                      | 39350  | 4.49  | 84  | 12.5 | Q8IIR7_PLAF7  | Transport           | Endoplasmic Reticulum | Down | -    | Up   | -    |
| gi 23504857  | Hsc70-interacting protein                                                                                                                   | 51092  | 4.67  | 45  | 14.6 | Q8I3J0_PLAF7  | Unknown             | Unknown               | Down | Down | Down | Down |
| gi 124806378 | ras-related protein Rab-2                                                                                                                   | 24408  | 6.33  | 45  | 46   | Q8I5A9_PLAF7  | Transport           | Membrane              | Down | -    | -    | -    |
| gi 23498727  | small exported membrane protein 1                                                                                                           | 14186  | 9.61  | 59  | 43.1 | Q8IC43_PLAF7  | Unknown             | Cytoplasm             | -    | -    | Up   | -    |
| gi 124806302 | WD repeat-containing protein, putative                                                                                                      | 378674 | 9.02  | 45  | 12.8 | Q8I5D0_PLAF7  | Nucleosome Assembly | Nucleus               | -    | Up   | Up   | Up   |
| gi 23615189  | small heat shock protein, putative                                                                                                          | 25179  | 6.02  | 73  | 25.1 | Q8IE50_PLAF7  | Protein fate        | Unknown               | -    | -    | -    | -    |

|              |                                                                                                                  |         |       |     |      |                  |                     |                 |      |      |      |      |
|--------------|------------------------------------------------------------------------------------------------------------------|---------|-------|-----|------|------------------|---------------------|-----------------|------|------|------|------|
| gi 23498791  | AAA family ATPase, CDC48 subfamily                                                                               | 141991  | 9.07  | 47  | 17.9 | CDAT_PLAF7       | Cell Cycle          | Apicoplast      | -    | -    | Down | -    |
| gi 23615236  | 60S ribosomal protein L24, putative                                                                              | 19232   | 10.43 | 43  | 23.5 | Q8IEM3_PLAF7     | Translation         | Cytoplasm       | Down | -    | -    | -    |
| gi 3758867   | proteasome subunit alpha type-3, putative                                                                        | 29270   | 6.38  | 48  | 35.7 | O77396_PLAF7     | Protein fate        | Nucleus         | -    | -    | -    | -    |
| gi 23498939  | proteasome subunit alpha type-5, putative                                                                        | 28370   | 4.96  | 147 | 38.3 | Q8IBI3_PLAF7     | Protein fate        | Cytoplasm       | Up   | Down | -    | -    |
| gi 124806724 | GAS8-like protein, putative                                                                                      | 54772   | 7.98  | 42  | 8.9  | Q8I505_PLAF7     | Cytoskeleton        | Golgi Apparatus | Down | Up   | Up   | Up   |
| gi 124802168 | eukaryotic translation initiation factor 2 subunit beta, putative                                                | 25306   | 9.23  | 42  | 43.2 | Q8IUT9_PLAF7     | Translation         | Cytoplasm       | Down | Up   | Up   | Up   |
| gi 124804998 | rifin                                                                                                            | 38701   | 8.96  | 62  | 28.1 | Q8IHM2_PLAF7     | Cell Surface        | Membrane        | -    | -    | -    | -    |
| gi 23504672  | WD repeat-containing protein 26, putative                                                                        | 150608  | 9.24  | 52  | 18.2 | Q8I3S4_PLAF7     | Unknown             | Unknown         | -    | -    | -    | -    |
| gi 6851056   | spermidine synthase                                                                                              | 36573   | 6.97  | 139 | 30.5 | Q9NFS5_PLAFA     | Metabolism          | Unknown         | -    | -    | Down | -    |
| gi 225632259 | U6 snRNA-associated Sm-like protein Lsm3,putative                                                                | 10694   | 5.16  | 115 | 61.5 | COH4W2_PLAF7     | Transcription       | Nucleus         | -    | -    | -    | -    |
| gi 258597872 | signal peptide peptidase                                                                                         | 47547   | 8.95  | 42  | 13.3 | Q8IKQ9_PLAF7     | Protein Signaling   | Cytoplasm       | Down | Up   | -    | -    |
| gi 124808815 | basic transcription factor 3b, putative                                                                          | 19381   | 9.04  | 55  | 29.2 | Q8ILK2_PLAF7     | Transcription       | Cytoplasm       | -    | -    | Down | -    |
| gi 7799189   | thioredoxin                                                                                                      | 11709   | 4.67  | 201 | 60.6 | A0A144A4E0_PLAF7 | Cell Rescue Defense | Cytoplasm       | Down | -    | -    | -    |
| gi 258597884 | 60S ribosomal protein L27                                                                                        | 16735   | 10.23 | 51  | 40.4 | Q8IKM5_PLAF7     | Translation         | Cytoplasm       | Down | -    | -    | -    |
| gi 124802189 | proteasome subunit beta type-5                                                                                   | 30577   | 5.18  | 46  | 16.6 | Q8IUT1_PLAF7     | Protein fate        | Cytoplasm       | -    | -    | Up   | -    |
| gi 75016029  | RecName: Full=STI1-like protein                                                                                  | 66015   | 6.63  | 50  | 15.8 | STI1L_PLAF7      | Unknown             | Cytoplasm       | Up   | -    | Down | -    |
| gi 124807078 | rhoptry neck protein 3                                                                                           | 262988  | 9.23  | 38  | 15.6 | Q8I4R5_PLAF7     | Invasion            | Rhoptry         | -    | -    | Down | -    |
| gi 23615363  | conserved Plasmodium protein, unknown function                                                                   | 170566  | 8.86  | 72  | 14.8 | Q8IEA7_PLAF7     | Unknown             | Unknown         | -    | -    | -    | -    |
| gi 23615558  | 40S ribosomal protein S6                                                                                         | 35363   | 10.44 | 37  | 17.3 | Q8IDR9_PLAF7     | Translation         | Cytoplasm       | Down | -    | -    | -    |
| gi 124809308 | thioredoxin peroxidase 1                                                                                         | 21793   | 6.65  | 90  | 31.3 | Q8IL80_PLAF7     | Cell Rescue Defense | Cytoplasm       | -    | Up   | -    | -    |
| gi 23505054  | 6-phosphofructokinase                                                                                            | 159351  | 6.32  | 90  | 19.2 | Q8I2Z8_PLAF7     | Metabolism          | Cytoplasm       | -    | Down | -    | -    |
| gi 4493898   | ubiquitin-conjugating enzyme E2, putative                                                                        | 16130   | 4.88  | 36  | 9.9  | O97241_PLAF7     | Protein fate        | Cytoplasm       | Down | -    | -    | -    |
| gi 23615263  | M1-family alanyl aminopeptidase                                                                                  | 125983  | 7.3   | 66  | 15.9 | Q8IEK1_PLAF7     | Metabolism          | Cytoplasm       | -    | -    | Up   | -    |
| gi 59798920  | RecName: Full=Serine-repeat antigen protein; AltName: Full=111 kDa antigen; AltName: Full=p126; Flags: Precursor | 111698  | 5.26  | 46  | 18.8 | SERA_PLAF7       | Cell Surface        | Lysosome        | -    | -    | -    | -    |
| gi 74930131  | RecName: Full=40S ribosomal protein SA                                                                           | 29837   | 5.91  | 46  | 25.5 | RSSA_PLAF7       | Translation         | Cytoplasm       | -    | -    | Up   | -    |
| gi 225632158 | conserved Plasmodium protein, unknown function                                                                   | 24366   | 5.2   | 35  | 10.5 | COH4M7_PLAF7     | Unknown             | Membrane        | -    | -    | -    | -    |
| gi 258596875 | 26S proteasome regulatory subunit RPN1,putative                                                                  | 108289  | 5.95  | 87  | 26   | O96153_PLAF7     | Protein fate        | Nucleus         | -    | Up   | -    | -    |
| gi 23499155  | 40S ribosomal protein S16, putative                                                                              | 16275   | 10.25 | 55  | 39.6 | Q8IAX5_PLAF7     | Translation         | Cytoplasm       | -    | Up   | -    | -    |
| gi 23615559  | aconitate hydratase                                                                                              | 103313  | 7.73  | 66  | 12.3 | Q8IDR8_PLAF7     | Translation         | Cytoplasm       | -    | -    | Up   | -    |
| gi 124806145 | polyadenylate-binding protein, putative                                                                          | 97169   | 8.96  | 85  | 15.7 | Q8I5H4_PLAF7     | Transcription       | Cytoplasm       | Up   | Down | -    | -    |
| gi 23504716  | multidrug resistance protein 1                                                                                   | 162150  | 8.94  | 118 | 18.7 | Q7K6A5_PLAF7     | Response to drug    | Membrane        | -    | -    | Up   | -    |
| gi 258597955 | conserved Plasmodium membrane protein, unknown function                                                          | 577659  | 8.86  | 44  | 11.7 | Q8IK96_PLAF7     | Unknown             | Unknown         | -    | -    | -    | -    |
| gi 23615265  | malonyl CoA-acyl carrier protein transacylase precursor                                                          | 46275   | 8.71  | 34  | 10.7 | Q8I6Z9_PLAF7     | Metabolism          | Apicoplast      | Down | -    | -    | -    |
| gi 75009813  | RecName: Full=Plasmepsin-1; AltName: Full=Aspartic hemoglobinase I; AltName: Full=PfAPG; Flags: Precursor        | 51428   | 6.72  | 65  | 15.7 | PLM1_PLAF7       | Metabolism          | Food Vacuole    | -    | -    | Down | -    |
| gi 124809547 | histidine-tRNA ligase, putative                                                                                  | 133583  | 7.91  | 34  | 21.7 | Q8IL22_PLAF7     | Translation         | Mitochondria    | Down | -    | -    | -    |
| gi 23615660  | Plasmodium exported protein, unknown function                                                                    | 32763   | 9.23  | 59  | 27   | Q8IDG9_PLAF7     | Unknown             | Membrane        | -    | -    | Down | -    |
| gi 23498992  | surface-associated interspersed protein 8.2 (SURFIN 8.2)                                                         | 248324  | 5.35  | 38  | 17.7 | Q8IBD4_PLAF7     | Unknown             | Membrane        | Up   | Down | Up   | Up   |
| gi 225632239 | conserved Plasmodium protein, unknown function                                                                   | 76808   | 5.34  | 69  | 23.1 | COH4U5_PLAF7     | Unknown             | Unknown         | -    | -    | -    | -    |
| gi 23615667  | proteasome subunit alpha type-4, putative                                                                        | 27930   | 5.85  | 47  | 20.3 | Q8IDG3_PLAF7     | Protein fate        | Cytoplasm       | -    | Up   | Up   | Up   |
| gi 225631627 | conserved Plasmodium protein, unknown function                                                                   | 207703  | 9.22  | 34  | 9.8  | COH493_PLAF7     | Unknown             | Unknown         | -    | -    | -    | -    |
| gi 124808276 | rhoptry-associated protein 1                                                                                     | 89996   | 6.67  | 148 | 15.3 | Q8ILZ1_PLAF7     | Unknown             | Rhoptry         | Down | -    | Up   | -    |
| gi 23476993  | Plasmodium exported protein (hyp8), unknown function                                                             | 28216   | 9.02  | 35  | 16.9 | Q8I2D9_PLAF7     | Unknown             | Cytoplasm       | -    | -    | Down | -    |
| gi 23504954  | dynein heavy chain, putative                                                                                     | 720134  | 6.18  | 32  | 10.6 | Q8I396_PLAF7     | Cytoskeleton        | Cytoplasm       | Down | Down | -    | Down |
| gi 225632293 | Plasmodium exported protein, unknown function                                                                    | 36390   | 5.74  | 35  | 22.2 | COH4Z7_PLAF7     | Unknown             | Unknown         | Down | Down | Down | Down |
| gi 23498950  | zinc finger, C3HC4 type, putative                                                                                | 253816  | 8.32  | 32  | 15.5 | Q8IBH2_PLAF7     | Unknown             | Unknown         | Down | Down | -    | Down |
| gi 13509187  | putative Rab7 GTPase                                                                                             | 23773   | 7.55  | 55  | 28.6 | COH516_PLAF7     | Unknown             | Membrane        | -    | -    | -    | -    |
| gi 23615267  | conserved Plasmodium protein, unknown function                                                                   | 34955   | 9.22  | 32  | 26.6 | Q8IEJ9_PLAF7     | Unknown             | Unknown         | Down | -    | -    | -    |
| gi 124808655 | surface protein P113                                                                                             | 112505  | 4.49  | 31  | 8.6  | Q8ILP3_PLAF7     | Unknown             | Membrane        | Down | -    | -    | -    |
| gi 258597176 | erythrocyte membrane protein 1, PfEMP1                                                                           | 248280  | 5.47  | 34  | 17.1 | Q8IIZ6_PLAF7     | Pathogenesis        | Membrane        | -    | -    | -    | -    |
| gi 23504621  | deoxyribodipyrimidine photo-lyase, putative                                                                      | 129117  | 9.22  | 34  | 11.6 | Q8IOW8_PLAF7     | DNA Replication     | Unknown         | -    | -    | -    | -    |
| gi 23615206  | conserved Plasmodium protein, unknown function                                                                   | 56775   | 9.53  | 34  | 11.9 | Q8IEQ3_PLAF7     | Unknown             | Unknown         | -    | -    | -    | -    |
| gi 258597334 | 26S proteasome regulatory subunit RPN7,putative                                                                  | 46595   | 6.38  | 31  | 13   | Q8II71_PLAF7     | Protein fate        | Cytoplasm       | Down | -    | -    | -    |
| gi 225632017 | conserved Plasmodium protein, unknown function                                                                   | 696614  | 7.88  | 39  | 11   | COH5H6_PLAF7     | Unknown             | Unknown         | -    | Down | -    | -    |
| gi 23615391  | 60S ribosomal protein L23                                                                                        | 22079   | 10.27 | 30  | 36.3 | Q8IE82_PLAF7     | Translation         | Cytoplasm       | -    | -    | Up   | -    |
| gi 225632182 | conserved Plasmodium protein, unknown function                                                                   | 126994  | 5.28  | 39  | 12   | COH4P6_PLAF7     | Unknown             | Unknown         | Down | -    | Down | Down |
| gi 23498915  | conserved Plasmodium protein, unknown function                                                                   | 36570   | 8.79  | 39  | 22   | Q8IBK7_PLAF7     | Unknown             | Unknown         | Down | -    | Down | Down |
| gi 23615173  | conserved Plasmodium protein, unknown function                                                                   | 95550   | 9.45  | 42  | 15.6 | Q8IET6_PLAF7     | Unknown             | Unknown         | -    | -    | -    | -    |
| gi 23498906  | metallo-hydrolase/oxidoreductase, putative                                                                       | 119584  | 7.01  | 47  | 16.9 | Q8IBL6_PLAF7     | Unknown             | Membrane        | Down | Up   | -    | -    |
| gi 23615182  | conserved Plasmodium protein, unknown function                                                                   | 1111079 | 9.12  | 30  | 15.6 | Q8IES7_PLAF7     | Unknown             | Membrane        | Down | -    | Down | Down |
| gi 225632238 | conserved Plasmodium protein, unknown function                                                                   | 36234   | 4.11  | 68  | 29.2 | COH4U4_PLAF7     | Unknown             | Unknown         | Up   | -    | -    | -    |
| gi 58176834  | Chain A, D-ribulose-5-phosphate 3-epimerase, Putative                                                            | 25532   | 6.07  | 41  | 30.4 | Q8I5L3_PLAF7     | Metabolism          | Cytoplasm       | -    | -    | -    | -    |
| gi 124809637 | conserved Plasmodium protein, unknown function                                                                   | 442796  | 8.64  | 29  | 10.6 | Q8IKY8_PLAF7     | Unknown             | Unknown         | -    | Up   | -    | -    |
| gi 23498938  | DNA (cytosine-5)-methyltransferase                                                                               | 83731   | 8.74  | 29  | 9.6  | Q8IBI4_PLAF7     | DNA Replication     | Nucleus         | Down | -    | Up   | -    |
| gi 408535927 | Chain A, Apicoplast Tic22, Putative                                                                              | 33232   | 9.24  | 41  | 38.4 | Q8I3H4_PLAF7     | Transport           | Apicoplast      | -    | Up   | -    | -    |
| gi 225631857 | conserved Plasmodium protein, unknown function                                                                   | 138544  | 8.44  | 45  | 15.7 | COH575_PLAF7     | Unknown             | Membrane        | -    | -    | -    | -    |
| gi 23504582  | asparagine-tRNA ligase                                                                                           | 85195   | 9.01  | 32  | 22.3 | Q8I408_PLAF7     | Translation         | Cytoplasm       | -    | -    | Up   | -    |
| gi 23615371  | 3',5'-cyclic nucleotide phosphodiesterase,putative                                                               | 133084  | 7.47  | 30  | 6.8  | Q8IGZ7_PLAF7     | Protein Signaling   | Membrane        | Down | -    | -    | -    |
| gi 3649757   | conserved Plasmodium protein, unknown function                                                                   | 202018  | 8.3   | 29  | 16.5 | O77322_PLAF7     | Unknown             | Cytoplasm       | -    | Down | Down | Down |

|              |                                                                  |         |       |     |      |                  |                 |                 |      |      |      |      |
|--------------|------------------------------------------------------------------|---------|-------|-----|------|------------------|-----------------|-----------------|------|------|------|------|
| gi 258597702 | 40S ribosomal protein S25                                        | 11656   | 10.12 | 44  | 55.2 | Q8ILN8_PLAF7     | Translation     | Cytoplasm       | Down | -    | Down | Down |
| gi 23615215  | U3 small nucleolar RNA-associated protein 6, putative            | 120650  | 5.51  | 29  | 5.6  | Q8IEP4_PLAF7     | Transcription   | Membrane        | Down | -    | Up   | -    |
| gi 124804079 | exported protein 1                                               | 17285   | 5.64  | 102 | 35.8 | Q8IIF0_PLAF7     | Metabolism      | Membrane        | -    | -    | -    | -    |
| gi 124801337 | vacuolar protein sorting-associated protein 45, putative         | 86202   | 6.51  | 33  | 5.7  | O96243_PLAF7     | Transport       | Cytoplasm       | -    | Up   | -    | -    |
| gi 74876421  | RecName: Full=ADP-ribosylation factor 1; Short=pfARF1            | 20899   | 5.83  | 52  | 33.1 | ARF1_PLAF7       | Transport       | Golgi Apparatus | -    | -    | -    | -    |
| gi 46362284  | conserved Plasmodium protein, unknown function                   | 25357   | 9.82  | 33  | 30.1 | C6KSQ0_PLAF7     | Unknown         | Unknown         | -    | Down | -    | -    |
| gi 7264037   | erythrocyte membrane protein 1, PfEMP1                           | 250321  | 5.29  | 26  | 17   | O97324_PLAF7     | Pathogenesis    | Membrane        | Down | -    | -    | -    |
| gi 124804967 | Plasmodium exported protein, unknown function                    | 51125   | 5.66  | 25  | 14.7 | Q8IHN2_PLAF7     | Unknown         | Unknown         | Down | -    | -    | -    |
| gi 124804772 | 60S ribosomal protein L35ae, putative                            | 16255   | 10.55 | 25  | 26.4 | Q8IHT9_PLAF7     | Translation     | Cytoplasm       | Down | Up   | Down | Down |
| gi 124808373 | conserved Plasmodium protein, unknown function                   | 390446  | 9.23  | 25  | 11.7 | Q8ILX0_PLAF7     | Unknown         | Unknown         | Up   | Down | Down | Down |
| gi 124809878 | transcription factor with AP2 domain(s)                          | 161410  | 8.98  | 36  | 8.2  | Q8IKR9_PLAF7     | Unknown         | Unknown         | Down | -    | Up   | -    |
| gi 124806892 | FK506-binding protein (FKBP)-type peptidyl-prolyl isomerase      | 34805   | 5.36  | 37  | 24.3 | Q8I4V8_PLAF7     | Protein fate    | Cytoplasm       | -    | -    | -    | -    |
| gi 23504953  | mitochondrial carrier protein, putative                          | 141981  | 9.63  | 28  | 20.9 | Q8I397_PLAF7     | Transport       | Membrane        | Down | -    | Up   | -    |
| gi 23504600  | RNA pseudouridylylase synthase, putative                         | 1186842 | 7.36  | 24  | 12.8 | MLRR1_PLAF7      | Metabolism      | Membrane        | -    | -    | -    | -    |
| gi 17148533  | Ran-binding protein                                              | 33176   | 4.92  | 57  | 16.4 | Q76NN6_PLAF7     | DNA Replication | Cytoplasm       | Up   | -    | Up   | Up   |
| gi 23505262  | Plasmodium exported protein (PHISTc), unknown function           | 45472   | 9.71  | 33  | 16.4 | Q8I2F2_PLAF7     | Unknown         | Membrane        | Down | Up   | Up   | Up   |
| gi 6562716   | conserved Plasmodium protein, unknown function                   | 229981  | 6.44  | 27  | 10.8 | Q9U0K8_PLAF7     | Unknown         | Unknown         | Down | Up   | -    | -    |
| gi 258549210 | conserved Plasmodium protein, unknown function                   | 30341   | 7.64  | 29  | 18.6 | C6S3I8_PLAF7     | Unknown         | Unknown         | Down | Up   | Up   | Up   |
| gi 258597832 | conserved Plasmodium protein, unknown function                   | 145360  | 8.39  | 23  | 9.4  | Q8IKZ3_PLAF7     | Unknown         | Nucleus         | Down | -    | -    | -    |
| gi 74862955  | RecName: Full=Origin recognition complex subunit 1; Short=PFORC1 | 138653  | 9.52  | 27  | 14.6 | ORC1_PLAF7       | DNA Replication | Cytoplasm       | -    | -    | Up   | -    |
| gi 23615256  | meiosis-specific nuclear structural protein 1, putative          | 61194   | 8.91  | 30  | 18.8 | Q8IEK6_PLAF7     | Unknown         | Unknown         | -    | Up   | -    | -    |
| gi 3649767   | SECIS-binding protein 2, putative                                | 71419   | 9.94  | 30  | 16.9 | O77331_PLAF7     | Translation     | Unknown         | -    | Up   | -    | -    |
| gi 23498865  | 60S ribosomal protein L11a, putative                             | 20215   | 10.1  | 36  | 25.4 | Q8IBQ6_PLAF7     | Translation     | Cytoplasm       | -    | -    | -    | -    |
| gi 23615806  | secreted ookinete protein, putative                              | 135752  | 4.66  | 37  | 16.1 | Q8ID30_PLAF7     | Unknown         | Unknown         | -    | -    | -    | -    |
| gi 1575675   | rab6                                                             | 27914   | 7.63  | 108 | 28.3 | Q94663_PLAFA     | Unknown         | Membrane        | -    | -    | Down | -    |
| gi 23504877  | conserved Plasmodium protein, unknown function                   | 225390  | 6.01  | 30  | 16   | Q8I3H0_PLAF7     | Unknown         | Unknown         | Up   | Down | Down | Down |
| gi 23499018  | magnesium transporter, putative                                  | 109581  | 9.53  | 23  | 10   | Q8IBA9_PLAF7     | Transport       | Membrane        | Down | -    | -    | -    |
| gi 23510645  | conserved Plasmodium protein, unknown function                   | 65626   | 9.65  | 23  | 11.4 | Q8I271_PLAF7     | Unknown         | Unknown         | Down | -    | -    | -    |
| gi 23615192  | DNA-directed RNA polymerase II subunit RPB11, putative           | 14116   | 8.37  | 30  | 31   | RPB11_PLAF7      | Transcription   | Cytoplasm       | Down | -    | -    | -    |
| gi 258597760 | conserved Plasmodium membrane protein, unknown function          | 682022  | 8.86  | 26  | 13.8 | Q8ILC9_PLAF7     | Unknown         | Unknown         | Down | -    | -    | -    |
| gi 225632153 | cytoskeleton associated protein, putative                        | 103523  | 6.43  | 22  | 7.9  | C0H4M2_PLAF7     | Unknown         | Unknown         | Down | -    | -    | -    |
| gi 225631936 | MORN repeat protein, putative                                    | 519893  | 9.15  | 29  | 10.3 | C0H5A3_PLAF7     | Unknown         | Membrane        | -    | Down | Down | Down |
| gi 124808756 | conserved Plasmodium protein, unknown function                   | 192484  | 9.67  | 29  | 16.8 | Q8ILL7_PLAF7     | Unknown         | Membrane        | -    | Down | Down | Down |
| gi 23615179  | sodium/hydrogen exchanger, Na+, H+ antiporter                    | 225940  | 8.68  | 29  | 11.4 | Q8IET0_PLAF7     | Transport       | Membrane        | Up   | Down | Down | Down |
| gi 124804234 | autophagy-related protein 7, putative                            | 156530  | 6.05  | 29  | 18.2 | Q8IIA3_PLAF7     | Protein fate    | Cytoplasm       | -    | Down | Down | Down |
| gi 124806636 | conserved Plasmodium protein, unknown function                   | 212627  | 4.96  | 29  | 12.8 | Q8I538_PLAF7     | Unknown         | Unknown         | -    | Down | Down | Down |
| gi 23504575  | conserved Plasmodium protein, unknown function                   | 369953  | 5.29  | 29  | 9    | Q8I414_PLAF7     | Unknown         | Unknown         | -    | Down | Down | Down |
| gi 124809084 | conserved Plasmodium protein, unknown function                   | 152167  | 8.42  | 29  | 12.9 | Q8ILD1_PLAF7     | Unknown         | Unknown         | -    | Down | Down | Down |
| gi 124805631 | conserved Plasmodium protein, unknown function                   | 208541  | 8.3   | 29  | 15.2 | Q8I5W3_PLAF7     | Unknown         | Unknown         | -    | Down | Down | Down |
| gi 124802600 | conserved Plasmodium protein, unknown function                   | 190279  | 8.29  | 29  | 10.9 | Q8IUF5_PLAF7     | Unknown         | Unknown         | -    | Down | Down | Down |
| gi 124804432 | conserved Plasmodium protein, unknown function                   | 133324  | 5.18  | 29  | 17.4 | Q8II44_PLAF7     | Unknown         | Unknown         | -    | Down | Down | Down |
| gi 124804384 | conserved Plasmodium protein, unknown function                   | 118257  | 8.84  | 29  | 14.6 | Q8II59_PLAF7     | Unknown         | Unknown         | -    | Down | Down | Down |
| gi 23504862  | eukaryotic translation initiation factor 3 subunit E, putative   | 61379   | 7.08  | 49  | 23.4 | Q8I3I5_PLAF7     | Translation     | Cytoplasm       | -    | Down | Down | Down |
| gi 225632254 | rRNA-processing protein FCF1, putative                           | 23145   | 9.63  | 29  | 23.2 | C0H4V7_PLAF7     | Unknown         | Nucleus         | Down | Down | Down | Down |
| gi 225631798 | conserved protein, unknown function                              | 296598  | 9.02  | 22  | 15.4 | C0H518_PLAF7     | Unknown         | Membrane        | Down | Down | Down | Down |
| gi 124806350 | subpellicular microtubule protein 2, putative                    | 30171   | 9.31  | 31  | 21.7 | Q8I5B7_PLAF7     | Unknown         | Unknown         | -    | -    | -    | -    |
| gi 124809790 | conserved Plasmodium protein, unknown function                   | 233153  | 7.99  | 22  | 7.5  | Q8IKU4_PLAF7     | Unknown         | Cytoplasm       | Down | -    | -    | -    |
| gi 46362277  | conserved Plasmodium protein, unknown function                   | 334204  | 8.49  | 22  | 18.4 | C6KSP3_PLAF7     | Unknown         | Unknown         | Down | Up   | Up   | Up   |
| gi 225632011 | heat shock protein 110, putative                                 | 108119  | 5.5   | 95  | 16.8 | C0H5H0_PLAF7     | Unknown         | Apicoplast      | -    | Up   | Up   | Up   |
| gi 124809582 | M17 leucyl aminopeptidase                                        | 67778   | 8.78  | 83  | 24.3 | Q8IL11_PLAF7     | Unknown         | Cytoplasm       | -    | Up   | -    | -    |
| gi 46362309  | conserved Plasmodium protein, unknown function                   | 324818  | 6.62  | 25  | 10.5 | LRR2_PLAF7       | Unknown         | Unknown         | Up   | -    | Up   | Up   |
| gi 124806590 | conserved Plasmodium protein, unknown function                   | 333978  | 9.16  | 21  | 12.4 | Q8I552_PLAF7     | Unknown         | Unknown         | Down | -    | -    | -    |
| gi 258597800 | conserved Plasmodium protein, unknown function                   | 152700  | 7.78  | 26  | 16   | Q8IL66_PLAF7     | Unknown         | Cytoplasm       | Down | -    | Up   | -    |
| gi 14530178  | Krueppel-like protein                                            | 151550  | 7.89  | 33  | 11.5 | Q95Z58_PLAFA     | Unknown         | Membrane        | Down | -    | Down | Down |
| gi 124810028 | conserved Plasmodium protein, unknown function                   | 118694  | 8.96  | 27  | 10.1 | Q8IKN6_PLAF7     | Unknown         | Unknown         | Down | -    | -    | -    |
| gi 124805005 | erythrocyte membrane protein 1, PfEMP1                           | 358992  | 5.63  | 21  | 15.5 | Q8IHM0_PLAF7     | Pathogenesis    | Nucleus         | Down | -    | -    | -    |
| gi 296005130 | Pfmc-2TM Maurer's cleft two transmembrane protein                | 27380   | 9.4   | 25  | 31.2 | AOA143ZWD4_PLAF7 | Unknown         | Membrane        | Up   | Up   | -    | Up   |
| gi 23498719  | Pfmc-2TM Maurer's cleft two transmembrane protein                | 27539   | 9.59  | 25  | 21.3 | Q8IC51_PLAF7     | Transport       | Membrane        | -    | Up   | -    | -    |
| gi 23498897  | conserved Plasmodium protein, unknown function                   | 66258   | 8.46  | 21  | 12.3 | Q8IBM5_PLAF7     | Unknown         | Unknown         | Down | -    | -    | -    |
| gi 124802749 | tRNA N6-adenosine theonylcarbamoyltransferase                    | 69530   | 7.49  | 20  | 15.2 | Q8I999_PLAF7     | Translation     | Cytoplasm       | Down | -    | -    | -    |



|              |                                                                                                                                              |         |       |     |      |              |               |              |      |      |      |      |
|--------------|----------------------------------------------------------------------------------------------------------------------------------------------|---------|-------|-----|------|--------------|---------------|--------------|------|------|------|------|
| gi 23505246  | vacuolar protein sorting-associated protein 33, putative                                                                                     | 135894  | 4.8   | 20  | 6.6  | Q8I2G8_PLAF7 | Transport     | Unknown      | Down | -    | -    | -    |
| gi 225631933 | conserved Plasmodium protein, unknown function                                                                                               | 418313  | 6.69  | 20  | 14.9 | C0H5A0_PLAF7 | Unknown       | Unknown      | Down | -    | -    | -    |
| gi 225631966 | conserved Plasmodium protein, unknown function                                                                                               | 404851  | 6.56  | 20  | 15.7 | C0H5C8_PLAF7 | Unknown       | Membrane     | -    | Down | -    | -    |
| gi 23498787  | 60S ribosomal protein L34                                                                                                                    | 17340   | 10.77 | 24  | 10.7 | Q8IBY4_PLAF7 | Translation   | Cytoplasm    | Down | -    | Down | Down |
| gi 224591371 | conserved Plasmodium protein, unknown function                                                                                               | 109211  | 6.62  | 20  | 18.7 | B9Z5I3_PLAF7 | Unknown       | Unknown      | Down | -    | -    | -    |
| gi 74864044  | RecName: Full=NAD-dependent protein deacetylase Sir2B; AltName: Full=Regulatory protein SIR2 homolog B; AltName: Full=SIR2-like protein B    | 154624  | 8.15  | 23  | 15.4 | SIR2B_PLAF7  | Transcription | Unknown      | Down | Up   | -    | -    |
| gi 13375179  | putative GTPase                                                                                                                              | 22872   | 6.18  | 47  | 16   | Q7K6A8_PLAF7 | Transport     | Membrane     | Down | -    | Down | Down |
| gi 124808388 | AAA family ATPase, putative                                                                                                                  | 142737  | 9.27  | 20  | 16.8 | Q8ILW7_PLAF7 | Unknown       | Unknown      | Down | -    | -    | -    |
| gi 124804419 | conserved Plasmodium protein, unknown function                                                                                               | 330099  | 6.16  | 21  | 12.1 | Q8II48_PLAF7 | Unknown       | Unknown      | Down | Down | -    | Down |
| gi 124808513 | metacaspase-like protein                                                                                                                     | 264761  | 9.31  | 20  | 9.3  | Q8ILT4_PLAF7 | Unknown       | Unknown      | Down | -    | -    | -    |
| gi 23498907  | conserved Plasmodium protein, unknown function                                                                                               | 260606  | 5.49  | 22  | 12.1 | Q8IBL5_PLAF7 | Unknown       | Unknown      | Up   | -    | -    | -    |
| gi 225631649 | transcription factor with AP2 domain(s)                                                                                                      | 399922  | 5.68  | 19  | 8    | AP2A_PLAF7   | Transcription | Nucleus      | Down | -    | -    | -    |
| gi 258597770 | dynein-related AAA-type ATPase, putative                                                                                                     | 970399  | 8.07  | 21  | 12.6 | Q8ILB9_PLAF7 | Translation   | Cytoplasm    | Down | -    | -    | -    |
| gi 225632063 | conserved Plasmodium protein, unknown function                                                                                               | 346585  | 7.11  | 21  | 12.6 | C0H5L6_PLAF7 | Unknown       | Membrane     | Down | -    | -    | -    |
| gi 23505158  | conserved Plasmodium protein, unknown function                                                                                               | 208459  | 7.88  | 19  | 7.7  | Q8I2Q1_PLAF7 | Unknown       | Cytoplasm    | Down | -    | -    | -    |
| gi 124802000 | hypothetical protein PF3D7_1004100                                                                                                           | 141831  | 8.61  | 20  | 15.4 | Q8IJZ6_PLAF7 | Unknown       | Unknown      | Down | -    | -    | -    |
| gi 124808735 | nucleolar GTP-binding protein 2, putative                                                                                                    | 57136   | 9.72  | 23  | 16.2 | Q8IIM2_PLAF7 | Metabolism    | Nucleus      | -    | Up   | -    | -    |
| gi 225685560 | 6-cysteine protein                                                                                                                           | 114662  | 6.28  | 20  | 7.5  | C0H478_PLAF7 | Unknown       | Membrane     | Down | -    | -    | -    |
| gi 124809716 | conserved Plasmodium protein, unknown function                                                                                               | 176123  | 5.42  | 23  | 10.2 | Q8IKW4_PLAF7 | Unknown       | Unknown      | Down | -    | -    | -    |
| gi 46361233  | HECT-domain (ubiquitin-transferase), putative                                                                                                | 1205255 | 8.19  | 25  | 13.9 | ALTH1_PLAF7  | Unknown       | Cytoplasm    | -    | -    | -    | -    |
| gi 124808084 | COBW domain-containing protein 1, putative                                                                                                   | 67839   | 6.04  | 19  | 7.3  | Q8IM39_PLAF7 | Unknown       | Unknown      | Down | -    | -    | -    |
| gi 3758839   | P-type ATPase, putative                                                                                                                      | 217882  | 8.09  | 23  | 10.2 | O77368_PLAF7 | Transport     | Membrane     | -    | -    | Up   | -    |
| gi 124801012 | serine repeat antigen 7                                                                                                                      | 109569  | 5.57  | 23  | 17.1 | O96163_PLAF7 | Cell Surface  | Lysosome     | -    | -    | Up   | -    |
| gi 4493893   | conserved Plasmodium protein, unknown function                                                                                               | 474832  | 8.71  | 30  | 12.7 | O97236_PLAF7 | Unknown       | Membrane     | Down | -    | -    | -    |
| gi 46361095  | conserved protein, unknown function                                                                                                          | 30831   | 5.62  | 19  | 26.3 | C6KSY5_PLAF7 | Unknown       | Nucleus      | Down | -    | -    | -    |
| gi 124809249 | conserved Plasmodium protein, unknown function                                                                                               | 25471   | 9.37  | 19  | 20.8 | Q8IL93_PLAF7 | Unknown       | Unknown      | Down | -    | -    | -    |
| gi 46361088  | conserved Plasmodium protein, unknown function                                                                                               | 123646  | 5.86  | 25  | 11.1 | C6KSX8_PLAF7 | Unknown       | Membrane     | Down | Up   | -    | -    |
| gi 23505265  | Plasmodium exported protein, unknown function                                                                                                | 31267   | 9.69  | 20  | 8.9  | Q8I2E9_PLAF7 | Unknown       | Membrane     | Down | Up   | Up   | Up   |
| gi 3649758   | T-complex protein 1 subunit eta                                                                                                              | 59540   | 5.45  | 52  | 26   | TCPH_PLAF7   | Protein fate  | Cytoplasm    | -    | -    | Up   | -    |
| gi 124801939 | tryptophan-rich antigen 3                                                                                                                    | 118597  | 5.41  | 23  | 9.8  | Q8IK14_PLAF7 | Unknown       | Membrane     | -    | -    | -    | -    |
| gi 258597255 | SET domain protein, putative                                                                                                                 | 94234   | 4.47  | 18  | 12.5 | Q8IIL1_PLAF7 | Unknown       | Unknown      | Down | -    | -    | -    |
| gi 124806112 | phospholipid-transporting ATPase, putative                                                                                                   | 190326  | 8.74  | 18  | 11.2 | Q8I5I3_PLAF7 | Transport     | Membrane     | Down | Up   | -    | -    |
| gi 124804153 | conserved Plasmodium protein, unknown function                                                                                               | 153603  | 6.77  | 24  | 13.5 | Q8IIC8_PLAF7 | Unknown       | Unknown      | -    | -    | -    | -    |
| gi 730436    | RecName: Full=Dihydroorotate dehydrogenase (quinone), mitochondrial; Short=DHODEhase; AltName: Full=Dihydroorotate oxidase; Flags: Precursor | 65517   | 9.14  | 32  | 13.7 | PYRD_PLAF7   | Metabolism    | Membrane     | Down | -    | -    | -    |
| gi 23498946  | conserved Plasmodium membrane protein, unknown function                                                                                      | 670693  | 9.3   | 17  | 8.1  | Q8IBH6_PLAF7 | Unknown       | Membrane     | Down | -    | -    | -    |
| gi 23498781  | conserved Plasmodium protein, unknown function                                                                                               | 407134  | 9.85  | 17  | 9.2  | Q8IBZ0_PLAF7 | Unknown       | Cytoplasm    | Down | -    | -    | -    |
| gi 225632037 | conserved Plasmodium protein, unknown function                                                                                               | 439635  | 7.81  | 27  | 7.9  | C0H5J3_PLAF7 | Unknown       | Unknown      | -    | Down | -    | -    |
| gi 225631835 | nitric oxide synthase, putative                                                                                                              | 92122   | 9.01  | 17  | 14.1 | C0H553_PLAF7 | Unknown       | Unknown      | Down | -    | -    | -    |
| gi 46361075  | leucine-rich repeat protein                                                                                                                  | 220157  | 5.56  | 17  | 17.8 | C6KSW6_PLAF7 | Unknown       | Unknown      | Down | -    | -    | -    |
| gi 258597622 | conserved Plasmodium protein, unknown function                                                                                               | 142616  | 9.55  | 16  | 14   | Q8IM60_PLAF7 | Unknown       | Unknown      | Down | -    | -    | -    |
| gi 258597535 | 60 kDa chaperonin                                                                                                                            | 81434   | 4.97  | 30  | 22.8 | Q8IOV3_PLAF7 | Protein fate  | Apicoplast   | Up   | Up   | -    | Up   |
| gi 258597961 | cysteine repeat modular protein 4                                                                                                            | 700473  | 8.43  | 37  | 12.9 | Q8IK84_PLAF7 | Transport     | Membrane     | -    | -    | Up   | -    |
| gi 23505139  | RNA-binding protein, putative                                                                                                                | 22965   | 9.51  | 27  | 20.3 | Q8I2R8_PLAF7 | Unknown       | Unknown      | Down | -    | Down | Down |
| gi 7670012   | rifin                                                                                                                                        | 39495   | 9.15  | 18  | 27.3 | Q9NFB0_PLAF7 | Cell Surface  | Membrane     | -    | -    | Down | -    |
| gi 3764022   | ATP-dependent RNA helicase DHX57, putative                                                                                                   | 267066  | 8.4   | 15  | 12.7 | O77360_PLAF7 | Transcription | Cytoplasm    | Down | -    | -    | -    |
| gi 23498174  | pre-mRNA-processing-splicing factor 8, putative                                                                                              | 366166  | 8.79  | 15  | 6.2  | Q8IX5_PLAF7  | Transcription | Nucleus      | Down | -    | -    | -    |
| gi 23504539  | conserved Plasmodium protein, unknown function                                                                                               | 89840   | 9.52  | 15  | 13.1 | Q8I448_PLAF7 | Unknown       | Unknown      | Down | -    | -    | -    |
| gi 258549051 | DnaJ protein, putative                                                                                                                       | 94626   | 6.66  | 15  | 14.6 | C6S3C2_PLAF7 | Unknown       | Unknown      | Down | -    | -    | -    |
| gi 23504963  | conserved Plasmodium protein, unknown function                                                                                               | 69116   | 9.51  | 15  | 17.3 | Q8I387_PLAF7 | Unknown       | Membrane     | Down | -    | -    | -    |
| gi 258597286 | palmitoyltransferase, putative                                                                                                               | 34757   | 8.24  | 15  | 19.8 | Q8IIF7_PLAF7 | Unknown       | Membrane     | Down | -    | -    | -    |
| gi 258597253 | glycerol-3-phosphate dehydrogenase, putative                                                                                                 | 44846   | 8.81  | 15  | 14.7 | Q8IIL4_PLAF7 | Metabolism    | Cytoplasm    | Down | -    | -    | -    |
| gi 46361274  | erythrocyte membrane protein 1, PfEMP1                                                                                                       | 456629  | 5.92  | 26  | 14.5 | C6KTF7_PLAF7 | Pathogenesis  | Membrane     | Down | -    | -    | -    |
| gi 124803766 | conserved Plasmodium protein, unknown function                                                                                               | 709774  | 9.02  | 14  | 8    | Q8IIN2_PLAF7 | Unknown       | Unknown      | Down | -    | -    | -    |
| gi 124802097 | conserved Plasmodium protein, unknown function                                                                                               | 452722  | 8.74  | 22  | 12.1 | Q8IJW2_PLAF7 | Unknown       | Unknown      | -    | -    | -    | -    |
| gi 23499052  | exonuclease, putative                                                                                                                        | 48070   | 8.91  | 14  | 34.2 | Q8IB75_PLAF7 | Unknown       | Unknown      | -    | -    | -    | -    |
| gi 23615467  | 60S ribosomal protein L23, putative                                                                                                          | 14983   | 9.9   | 39  | 62.6 | Q8IE09_PLAF7 | Translation   | Cytoplasm    | -    | Down | Up   | -    |
| gi 124804504 | heat shock protein 70                                                                                                                        | 73252   | 6.51  | 228 | 30.5 | Q8II24_PLAF7 | Protein fate  | Mitochondria | Up   | -    | -    | -    |
| gi 124808181 | plasmepsin III                                                                                                                               | 51661   | 8.05  | 202 | 35.9 | Q8IM15_PLAF7 | Metabolism    | Food Vacuole | Up   | -    | Down | -    |
| gi 47169189  | Chain A, Uridine Phosphorylase, Putative                                                                                                     | 27745   | 6.32  | 188 | 44.3 | Q8I3X4_PLAF7 | Metabolism    | Unknown      | Up   | Up   | -    | Up   |
| gi 23615408  | phosphoribosylpyrophosphate synthetase                                                                                                       | 49352   | 9.39  | 151 | 26.3 | Q8IE67_PLAF7 | Metabolism    | Unknown      | Up   | Up   | -    | Up   |
| gi 10129955  | S-adenosylmethionine synthetase                                                                                                              | 44816   | 6.28  | 250 | 31.1 | Q9GN14_PLAFA | Metabolism    | Unknown      | Up   | Up   | -    | Up   |
| gi 23615594  | DNA/RNA-binding protein Alba 2                                                                                                               | 24969   | 7.68  | 233 | 39.3 | Q8IDN4_PLAF7 | Unknown       | Cytoplasm    | Up   | -    | -    | -    |
| gi 322812543 | Chain A, Glucose-6-phosphate isomerase                                                                                                       | 69517   | 6.9   | 144 | 24.3 | Q8ILA4_PLAF7 | Metabolism    | Unknown      | Up   | -    | Up   | Up   |
| gi 124809020 | 60S ribosomal protein L14, putative                                                                                                          | 19285   | 10.2  | 65  | 14.5 | Q8IIL8_PLAF7 | Translation   | Cytoplasm    | Up   | -    | -    | -    |
| gi 124810100 | 40S ribosomal protein S28e, putative                                                                                                         | 7489    | 10.83 | 329 | 50.7 | Q8IKL9_PLAF7 | Translation   | Cytoplasm    | Up   | -    | -    | -    |
| gi 13397937  | putative Rab2 GTPase                                                                                                                         | 24394   | 6.33  | 60  | 23.9 | Q9BHT6_PLAFA | Unknown       | Unknown      | Up   | -    | Down | -    |
| gi 46361134  | 60S ribosomal protein L27a, putative                                                                                                         | 16712   | 10.54 | 59  | 31.8 | C6KT23_PLAF7 | Translation   | Cytoplasm    | Up   | Up   | -    | Up   |
| gi 225631680 | serine/arginine-rich splicing factor 1                                                                                                       | 34540   | 10.61 | 51  | 12.8 | Q8I3T5_PLAF7 | Transcription | Nucleus      | Up   | -    | -    | -    |

|              |                                                                         |        |       |     |      |              |                     |              |    |      |      |      |
|--------------|-------------------------------------------------------------------------|--------|-------|-----|------|--------------|---------------------|--------------|----|------|------|------|
| gi 45478047  | macrophage migration inhibitory factor-like protein                     | 12836  | 6.15  | 396 | 56.9 | Q6Q3H7_PLAFA | Unknown             | Unknown      | Up | -    | -    | -    |
| gi 23504502  | rhoptry-associated protein 2                                            | 46709  | 8.9   | 57  | 25.6 | Q8I484_PLAF7 | Invasion            | Rhoptry      | Up | -    | -    | -    |
| gi 4493905   | 40S ribosomal protein S23, putative                                     | 16120  | 10.83 | 66  | 33.8 | O97248_PLAF7 | Translation         | Cytoplasm    | Up | -    | Up   | Up   |
| gi 23615434  | proteasome subunit beta type-7, putative                                | 29942  | 7.98  | 62  | 27.4 | Q8I6T3_PLAF7 | Protein fate        | Cytoplasm    | Up | -    | -    | -    |
| gi 46362290  | DNA repair protein RAD50, putative                                      | 267786 | 8.78  | 39  | 17.6 | RAD50_PLAF7  | Cell Cycle          | Nucleus      | Up | Up   | -    | Up   |
| gi 23615274  | Plasmodium exported protein (hyp12), unknown function                   | 45997  | 4.62  | 39  | 7.3  | Q8IEJ2_PLAF7 | Unknown             | Unknown      | Up | -    | -    | -    |
| gi 23510644  | centrin-1                                                               | 19587  | 4.78  | 39  | 11.9 | Q8I272_PLAF7 | Unknown             | Unknown      | Up | -    | -    | -    |
| gi 23498308  | Plasmodium exported protein (PHISTb), unknown function                  | 35939  | 8.75  | 88  | 32   | Q8IFM0_PLAF7 | Unknown             | Unknown      | Up | -    | Up   | Up   |
| gi 7340797   | cytoadherence linked asexual protein 3.2                                | 167382 | 6.74  | 36  | 13   | O77309_PLAF7 | Cell Surface        | Membrane     | Up | -    | Down | -    |
| gi 4493872   | cytoadherence linked asexual protein 3.1                                | 167134 | 6.75  | 36  | 13.5 | O77310_PLAF7 | Cell Surface        | Membrane     | Up | -    | Down | -    |
| gi 124809004 | conserved Plasmodium protein, unknown function                          | 146396 | 9.2   | 36  | 9.9  | Q8I1F3_PLAF7 | Unknown             | Unknown      | Up | -    | -    | -    |
| gi 23499061  | RNA-binding protein, putative                                           | 32421  | 9.11  | 81  | 15.4 | Q8I866_PLAF7 | Translation         | Unknown      | Up | -    | Up   | Up   |
| gi 124803451 | 60S acidic ribosomal protein P1, putative                               | 13006  | 4.57  | 82  | 39   | Q8I1X0_PLAF7 | Translation         | Cytoplasm    | Up | -    | -    | -    |
| gi 258596969 | conserved Plasmodium protein, unknown function                          | 14508  | 6.09  | 35  | 33.9 | Q8IK07_PLAF7 | Unknown             | Unknown      | Up | -    | -    | -    |
| gi 124803615 | casein kinase 2, alpha subunit                                          | 39865  | 8.9   | 50  | 23   | Q8I1R9_PLAF7 | Regulation          | Cytoplasm    | Up | -    | -    | -    |
| gi 23498804  | erythrocyte membrane protein 1, PfEMP1                                  | 248785 | 5.3   | 33  | 15.3 | Q8IBW7_PLAF7 | Pathogenesis        | Membrane     | Up | -    | -    | -    |
| gi 46361054  | conserved Plasmodium protein, unknown function                          | 244517 | 6.06  | 33  | 8    | C6KSU6_PLAF7 | Unknown             | Unknown      | Up | -    | -    | -    |
| gi 3694805   | cytoadherence linked asexual protein, partial                           | 160994 | 8.98  | 42  | 20.1 | O77090_PLAFA | Unknown             | Membrane     | Up | Up   | -    | Up   |
| gi 23505252  | cytoadherence linked asexual protein 9                                  | 160313 | 8.88  | 42  | 17.1 | Q8I2G2_PLAF7 | Cell Surface        | Membrane     | Up | Up   | Up   | Up   |
| gi 124805343 | erythrocyte membrane protein 1, PfEMP1                                  | 333038 | 6.39  | 32  | 18.1 | Q8I640_PLAF7 | Pathogenesis        | Membrane     | Up | -    | -    | -    |
| gi 124806687 | erythrocyte membrane protein 1, PfEMP1                                  | 300099 | 5.43  | 36  | 13.2 | Q8I521_PLAF7 | Pathogenesis        | Membrane     | Up | Down | -    | -    |
| gi 46361276  | erythrocyte membrane protein 1, PfEMP1                                  | 254458 | 5.66  | 36  | 18.5 | C6KTF9_PLAF7 | Pathogenesis        | Membrane     | Up | Down | -    | -    |
| gi 124801366 | ATP synthase F1, alpha subunit                                          | 61731  | 8.72  | 33  | 19.6 | O96252_PLAF7 | Metabolism          | Mitochondria | Up | Down | Up   | Up   |
| gi 116668029 | Chain A, Spermidine Synthase                                            | 32162  | 6.18  | 139 | 34.6 | Q8I173_PLAF7 | Metabolism          | Cytoplasm    | Up | -    | -    | -    |
| gi 258596882 | serine repeat antigen 6                                                 | 118761 | 5.89  | 43  | 16.3 | Q9TY96_PLAF7 | Cell Surface        | Lysosome     | Up | -    | -    | -    |
| gi 8439487   | hypothetical protein, partial                                           | 23455  | 5.87  | 61  | 14.6 | Q9NNV9_PLAFA | Unknown             | Membrane     | Up | -    | Up   | Up   |
| gi 34305467  | membrane-associated histidine-rich protein, partial                     | 26918  | 6.06  | 31  | 10.8 | Q6V0W8_PLAFA | Unknown             | Membrane     | Up | -    | -    | -    |
| gi 15375389  | 60S ribosomal protein L7, putative                                      | 30504  | 10.35 | 55  | 18.7 | O97250_PLAF7 | Translation         | Cytoplasm    | Up | Down | -    | -    |
| gi 124805983 | clathrin heavy chain, putative                                          | 232803 | 6     | 38  | 12.3 | Q8I5L6_PLAF7 | Transport           | Cytoplasm    | Up | Down | Up   | Up   |
| gi 23499287  | hypothetical protein, partial                                           | 82064  | 9.28  | 30  | 12.6 | C0H4L7_PLAF7 | Unknown             | Membrane     | Up | Down | -    | -    |
| gi 124805775 | eukaryotic translation initiation factor 3 subunit A, putative          | 165959 | 6.38  | 30  | 9.4  | Q8I5S6_PLAF7 | Translation         | Cytoplasm    | Up | -    | -    | -    |
| gi 23505053  | conserved Plasmodium protein, unknown function                          | 85353  | 9.1   | 32  | 12.3 | Q8I2Z9_PLAF7 | Unknown             | Unknown      | Up | -    | Up   | Up   |
| gi 23505032  | elongation factor 1-beta                                                | 32007  | 4.94  | 50  | 25.4 | Q8I320_PLAF7 | Unknown             | Unknown      | Up | Up   | -    | Up   |
| gi 124804341 | parasitophorous vacuolar protein 1                                      | 51919  | 4.97  | 29  | 24.3 | Q8I172_PLAF7 | Unknown             | Cytoplasm    | Up | -    | Up   | Up   |
| gi 23498743  | tRNA m5C-methyltransferase, putative                                    | 141140 | 6.35  | 30  | 17   | Q8IC28_PLAF7 | Regulation          | Unknown      | Up | Up   | Down | Up   |
| gi 23504571  | guanidine nucleotide exchange factor                                    | 303926 | 8.53  | 28  | 7.4  | Q8I418_PLAF7 | DNA Replication     | Nucleus      | Up | -    | -    | -    |
| gi 258597440 | antigen 332, DBL-like protein                                           | 688870 | 3.86  | 45  | 5.2  | Q8IHN4_PLAF7 | Pathogenesis        | Membrane     | Up | -    | Up   | Up   |
| gi 124808633 | conserved Plasmodium protein, unknown function                          | 170332 | 5.89  | 27  | 13.7 | Q8I1P9_PLAF7 | Unknown             | Unknown      | Up | -    | -    | -    |
| gi 124808549 | NOT family protein, putative                                            | 519499 | 6.88  | 27  | 11.8 | Q8I1S4_PLAF7 | Translation         | Cytoplasm    | Up | Up   | -    | Up   |
| gi 23504536  | trafficking protein particle complex subunit 8, putative                | 328469 | 7.22  | 30  | 12.6 | Q8I451_PLAF7 | Unknown             | Unknown      | Up | -    | -    | -    |
| gi 23498839  | eukaryotic translation initiation factor 3 subunit I, putative          | 37261  | 6.43  | 36  | 19.6 | Q8IBT2_PLAF7 | Translation         | Cytoplasm    | Up | Down | Down | Down |
| gi 356624409 | Chain A, Translationally-controlled Tumor Protein Homolog               | 21594  | 4.9   | 26  | 19.7 | TCTP_PLAF7   | Cell Cycle          | Cytoplasm    | Up | Up   | -    | Up   |
| gi 124806152 | histone chaperone ASF1, putative                                        | 31527  | 4.37  | 26  | 11.7 | Q8I5H2_PLAF7 | Nucleosome Assembly | Nucleus      | Up | -    | -    | -    |
| gi 59797635  | RecName: Full=Glycophorin-binding protein; AltName: Full=GBP-130        | 95786  | 5.02  | 26  | 14.9 | GBP_PLAF7    | Unknown             | Cytoplasm    | Up | -    | -    | -    |
| gi 402550052 | Chain A, Deoxyuridine 5'-triphosphate Nucleotidohydrolase, Putative     | 20626  | 6.59  | 80  | 27.6 | Q8I192_PLAF7 | DNA Replication     | Unknown      | Up | -    | -    | -    |
| gi 23504945  | signal peptidase complex subunit 3, putative                            | 22194  | 9.34  | 25  | 16.2 | Q8I3A5_PLAF7 | Protein Signaling   | Membrane     | Up | -    | -    | -    |
| gi 225631760 | transcription factor with AP2 domain(s), putative                       | 237219 | 9     | 24  | 10.2 | C6KT65_PLAF7 | Transcription       | Unknown      | Up | -    | -    | -    |
| gi 124808263 | alpha/beta hydrolase, putative                                          | 41458  | 6.51  | 25  | 13.8 | Q8I1Z4_PLAF7 | Unknown             | Unknown      | Up | -    | -    | -    |
| gi 23504898  | lysine-rich membrane-associated PHISTb protein                          | 61048  | 9.34  | 100 | 27.5 | Q8I3F0_PLAF7 | Unknown             | Cytoplasm    | Up | -    | -    | -    |
| gi 225631686 | proteasome subunit beta type-1, putative                                | 27251  | 6.59  | 24  | 9.6  | C0H4E8_PLAF7 | Protein fate        | Cytoplasm    | Up | -    | -    | -    |
| gi 23615433  | conserved Plasmodium protein, unknown function                          | 319935 | 7.32  | 25  | 15.5 | Q8IE42_PLAF7 | Unknown             | Unknown      | Up | Down | Down | Down |
| gi 23499096  | conserved Plasmodium protein, unknown function                          | 170170 | 6.4   | 27  | 12.1 | Q8IB33_PLAF7 | Unknown             | Unknown      | Up | Up   | -    | Up   |
| gi 225632226 | peptidase family C50, putative                                          | 697746 | 8.41  | 30  | 11.9 | C0H4T3_PLAF7 | Unknown             | Nucleus      | Up | -    | -    | -    |
| gi 124806110 | DNA gyrase subunit A                                                    | 143055 | 9.39  | 23  | 9.8  | Q8I0X3_PLAF7 | DNA Replication     | Apicoplast   | Up | -    | -    | -    |
| gi 124805429 | high mobility group protein B1                                          | 11324  | 9.96  | 51  | 25.8 | Q8I616_PLAF7 | Transcription       | Nucleus      | Up | -    | Down | -    |
| gi 124810337 | conserved Plasmodium protein, unknown function                          | 68624  | 8.96  | 23  | 9.7  | Q8IKD1_PLAF7 | Unknown             | Unknown      | Up | -    | -    | -    |
| gi 23505130  | DNA-directed RNA polymerase II subunit RPB3, putative                   | 38322  | 6.01  | 23  | 26.3 | Q8I2S6_PLAF7 | Transcription       | Cytoplasm    | Up | -    | -    | -    |
| gi 23504860  | proteasome maturation factor UMP1, putative                             | 14594  | 5.27  | 22  | 5.6  | Q8I3I7_PLAF7 | Unknown             | Cytoplasm    | Up | -    | -    | -    |
| gi 74862993  | RecName: Full=Uncharacterized protein PFB0765w                          | 166903 | 6.19  | 25  | 17.1 | YPF11_PLAF7  | Unknown             | Unknown      | Up | Down | Up   | Up   |
| gi 8248757   | DNA polymerase alpha catalytic subunit A                                | 225260 | 8.55  | 22  | 14.2 | Q9U0H1_PLAF7 | DNA Replication     | Nucleus      | Up | -    | -    | -    |
| gi 23615691  | ubiquitin-conjugating enzyme, putative                                  | 22869  | 5.32  | 40  | 17.3 | Q8IDD9_PLAF7 | Protein fate        | Cytoplasm    | Up | -    | Up   | Up   |
| gi 258597812 | conserved Plasmodium protein, unknown function                          | 70994  | 9.15  | 24  | 19   | Q8I139_PLAF7 | Unknown             | Unknown      | Up | Up   | -    | Up   |
| gi 74929507  | RecName: Full=Actin-1; AltName: Full=Actin I                            | 41844  | 5.21  | 78  | 24.7 | ACT1_PLAF7   | Cytoskeleton        | Cytoplasm    | Up | -    | Up   | Up   |
| gi 124810134 | conserved Plasmodium protein, unknown function                          | 97606  | 9.6   | 21  | 10.3 | Q8IKK6_PLAF7 | Unknown             | Unknown      | Up | -    | -    | -    |
| gi 23498914  | mitochondrial import inner membrane translocase subunit TIM14, putative | 13044  | 10.09 | 21  | 22.6 | Q8IBK8_PLAF7 | Unknown             | Unknown      | Up | -    | Up   | Up   |
| gi 23498760  | RAP protein, putative                                                   | 142168 | 8.58  | 21  | 7.8  | Q8IC11_PLAF7 | Unknown             | Membrane     | Up | -    | -    | -    |
| gi 23498806  | Pfmc-2TM Maurer's cleft two transmembrane protein                       | 27311  | 9.57  | 21  | 21.2 | Q8IBW5_PLAF7 | Transport           | Membrane     | Up | -    | -    | -    |
| gi 23615656  | P-loop containing nucleoside triphosphate hydrolase, putative           | 304114 | 6.24  | 21  | 10   | Q8IDH3_PLAF7 | Transcription       | Nucleus      | Up | -    | -    | -    |
| gi 23498260  | conserved Plasmodium protein, unknown function                          | 296268 | 5.86  | 20  | 6.7  | Q8I1P3_PLAF7 | Unknown             | Membrane     | Up | -    | -    | -    |

|              |                                                                     |         |       |     |      |               |                     |                       |    |      |      |      |
|--------------|---------------------------------------------------------------------|---------|-------|-----|------|---------------|---------------------|-----------------------|----|------|------|------|
| gi 225631696 | conserved Plasmodium protein, unknown function                      | 1116481 | 9.37  | 39  | 11.1 | C0H4F8_PLAF7  | Unknown             | Membrane              | Up | Up   | Down | Up   |
| gi 23498206  | structural maintenance of chromosomes protein 3, putative           | 141137  | 6.48  | 20  | 20.7 | SMC3_PLAF7    | Cell Cycle          | Nucleus               | Up | -    | -    | -    |
| gi 23615774  | aldehyde reductase, putative                                        | 106055  | 9.18  | 20  | 15.9 | Q8ID61_PLAF7  | Unknown             | Apicoplast            | Up | -    | -    | -    |
| gi 124802266 | conserved Plasmodium protein, unknown function                      | 173168  | 5.76  | 20  | 9.1  | Q8IUQ4_PLAF7  | Unknown             | Unknown               | Up | -    | -    | -    |
| gi 124802886 | U2 snRNA/tRNA pseudouridine synthase, putative                      | 116647  | 8.58  | 20  | 12.3 | Q8IJ59_PLAF7  | Metabolism          | Nucleus               | Up | -    | -    | -    |
| gi 124802424 | uncharacterized protein PF3D7_1018800                               | 85496   | 9.49  | 20  | 5.2  | Q8IIL4_PLAF7  | Unknown             | Unknown               | Up | -    | -    | -    |
| gi 124805367 | RESA-like protein with PHIST and DnaJ domains                       | 107558  | 7.04  | 20  | 14   | Q8I634_PLAF7  | Unknown             | Unknown               | Up | -    | -    | -    |
| gi 23615579  | aspartate carbamoyltransferase                                      | 43224   | 8.55  | 21  | 17.1 | Q8IDP8_PLAF7  | Metabolism          | Cytoplasm             | Up | Down | -    | -    |
| gi 23615157  | erythrocyte membrane protein 1, PfEMP1                              | 385533  | 5.62  | 20  | 13.8 | Q8IEU9_PLAF7  | Pathogenesis        | Membrane              | Up | -    | -    | -    |
| gi 124804730 | conserved Plasmodium protein, unknown function                      | 120306  | 9.15  | 20  | 12.3 | Q8IHV2_PLAF7  | Unknown             | Unknown               | Up | -    | -    | -    |
| gi 225631639 | histone acetyltransferase, putative                                 | 146635  | 6.29  | 23  | 9.1  | C0H4A7_PLAF7  | Nucleosome Assembly | Nucleus               | Up | -    | Down | -    |
| gi 124804435 | T-complex protein 1 subunit alpha                                   | 60223   | 6.65  | 47  | 18.2 | Q8II43_PLAF7  | Protein fate        | Cytoplasm             | Up | -    | -    | -    |
| gi 124805672 | conserved Plasmodium protein, unknown function                      | 25749   | 6.04  | 19  | 14   | Q8ISV2_PLAF7  | Unknown             | Unknown               | Up | -    | -    | -    |
| gi 23615411  | conserved Plasmodium protein, unknown function                      | 79471   | 8.88  | 24  | 9.4  | Q8IE64_PLAF7  | Unknown             | Unknown               | Up | -    | -    | -    |
| gi 3758855   | conserved Plasmodium protein, unknown function                      | 402704  | 4.68  | 18  | 8.8  | LRR4_PLAF7    | Unknown             | Cytoplasm             | Up | -    | -    | -    |
| gi 23498756  | inositol-phosphate phosphatase, putative                            | 330496  | 7.09  | 18  | 10.1 | Q8IC15_PLAF7  | Regulation          | Unknown               | Up | -    | -    | -    |
| gi 124802292 | conserved Plasmodium protein, unknown function                      | 267819  | 7.84  | 18  | 11.5 | Q8IUP6_PLAF7  | Unknown             | Unknown               | Up | -    | -    | -    |
| gi 124804827 | conserved Plasmodium protein, unknown function                      | 175302  | 6.41  | 18  | 10.7 | Q8IHS3_PLAF7  | Unknown             | Unknown               | Up | -    | -    | -    |
| gi 124803597 | transcription factor with AP2 domain(s)                             | 206747  | 5.63  | 18  | 12.4 | Q8IIS4_PLAF7  | Unknown             | Unknown               | Up | -    | Down | -    |
| gi 23499166  | probable protein, unknown function                                  | 187594  | 9.38  | 18  | 4.9  | Q8IAW4_PLAF7  | Unknown             | Membrane              | Up | -    | -    | -    |
| gi 124803042 | rifin                                                               | 40212   | 8.67  | 18  | 29.5 | Q8II09_PLAF7  | Cell Surface        | Membrane              | Up | Down | -    | -    |
| gi 224591363 | Pfmc-2TM Maurer's cleft two transmembrane protein                   | 27543   | 9.69  | 18  | 16.2 | B9ZSH7_PLAF7  | Transport           | Membrane              | Up | -    | -    | -    |
| gi 124805437 | conserved Plasmodium protein, unknown function                      | 20310   | 9.22  | 18  | 4.7  | Q8I614_PLAF7  | Unknown             | Unknown               | Up | -    | -    | -    |
| gi 124806077 | transcription factor with AP2 domain(s)                             | 301724  | 6.89  | 18  | 8.9  | Q8IS11_PLAF7  | Unknown             | Unknown               | Up | -    | -    | -    |
| gi 7768291   | 40S ribosomal protein S11, putative                                 | 18748   | 10.18 | 18  | 15.5 | O77381_PLAF7  | Translation         | Cytoplasm             | Up | -    | -    | -    |
| gi 3758843   | conserved Plasmodium protein, unknown function                      | 592883  | 9.05  | 17  | 12.6 | O77372_PLAF7  | Unknown             | Membrane              | Up | -    | -    | -    |
| gi 23504617  | conserved Plasmodium protein, unknown function                      | 331924  | 9.2   | 17  | 12   | Q8I3X5_PLAF7  | Unknown             | Nucleus               | Up | -    | -    | -    |
| gi 23504632  | conserved Plasmodium protein, unknown function                      | 190407  | 9.71  | 24  | 9    | Q8I3W1_PLAF7  | Unknown             | Membrane              | Up | Down | -    | -    |
| gi 225632147 | conserved Plasmodium protein, unknown function                      | 196449  | 8.24  | 16  | 11   | C0H4L6_PLAF7  | Unknown             | Unknown               | Up | -    | -    | -    |
| gi 7264041   | pre-mRNA-splicing factor PRP46, putative                            | 69529   | 8.6   | 16  | 6.7  | O97334_PLAF7  | Transcription       | Nucleus               | Up | -    | -    | -    |
| gi 23498873  | ferredoxin reductase-like protein                                   | 72675   | 8.91  | 26  | 24.9 | Q8IBP8_PLAF7  | Cell Rescue Defense | Unknown               | Up | Down | -    | -    |
| gi 23504638  | phosphatidylinositol 3-kinase                                       | 255758  | 9.27  | 16  | 11.2 | Q8I3V5_PLAF7  | Regulation          | Food Vacuole          | Up | Up   | -    | Up   |
| gi 258596863 | protein kinase, putative                                            | 293584  | 6.84  | 16  | 13   | O96134_PLAF7  | Regulation          | Cytoplasm             | Up | -    | -    | -    |
| gi 258596939 | DnaJ protein, putative                                              | 117215  | 8.77  | 25  | 18.7 | O96276_PLAF7  | Unknown             | Unknown               | Up | Down | -    | -    |
| gi 225685561 | conserved Plasmodium protein, unknown function                      | 83028   | 8.83  | 16  | 13.2 | C0H479_PLAF7  | Unknown             | Unknown               | Up | -    | -    | -    |
| gi 46361062  | transketolase                                                       | 75767   | 6.5   | 62  | 15.6 | C6KSV3_PLAF7  | Metabolism          | Cytoplasm             | Up | -    | -    | -    |
| gi 46362240  | rifin                                                               | 41283   | 8.18  | 15  | 17.8 | C6KSK9_PLAF7  | Cell Surface        | Membrane              | Up | -    | -    | -    |
| gi 23499205  | rifin                                                               | 43647   | 8.43  | 15  | 12.9 | Q8IIAS5_PLAF7 | Cell Surface        | Membrane              | Up | -    | -    | -    |
| gi 225631825 | 50S ribosomal protein L3, apicoplast, putative                      | 36251   | 9.95  | 15  | 14.2 | C0H543_PLAF7  | Translation         | Cytoplasm             | Up | -    | -    | -    |
| gi 124809291 | cleavage and polyadenylation specificity factor subunit 3, putative | 101120  | 5.29  | 15  | 8.6  | Q8II83_PLAF7  | Transcription       | Nucleus               | Up | -    | -    | -    |
| gi 3758842   | cleavage and polyadenylation specificity factor, putative           | 118775  | 8.49  | 15  | 12.1 | O77371_PLAF7  | Transcription       | Nucleus               | Up | -    | -    | -    |
| gi 23504588  | peptidyl-prolyl cis-trans isomerase                                 | 86985   | 6.98  | 15  | 9.4  | Q8I402_PLAF7  | Protein fate        | Unknown               | Up | -    | -    | -    |
| gi 124809181 | conserved Plasmodium protein, unknown function                      | 30461   | 5.08  | 15  | 11   | Q8IIA9_PLAF7  | Unknown             | Cytoplasm             | Up | -    | -    | -    |
| gi 124810013 | WD repeat-containing protein, putative                              | 113162  | 5.51  | 14  | 8.6  | Q8IKN9_PLAF7  | Unknown             | Unknown               | Up | -    | -    | -    |
| gi 225631940 | conserved Plasmodium protein, unknown function                      | 737235  | 9.13  | 21  | 11.3 | C0H5A6_PLAF7  | Unknown             | Membrane              | Up | Down | Down | Down |
| gi 124802320 | heat shock protein 60                                               | 62512   | 6.71  | 65  | 33.1 | Q8IJN9_PLAF7  | Protein fate        | Cytoplasm             | -  | -    | -    | -    |
| gi 258596910 | T-complex protein 1 subunit theta                                   | 60920   | 7.79  | 60  | 27.1 | O96220_PLAF7  | Regulation          | Cytoplasm             | -  | Down | -    | -    |
| gi 23504543  | small ubiquitin-related modifier                                    | 11053   | 4.74  | 52  | 38   | Q8I444_PLAF7  | Metabolism          | Nucleus               | -  | Down | Down | Down |
| gi 124803903 | heat shock protein 101                                              | 102810  | 9.17  | 35  | 21.2 | Q8IIJ8_PLAF7  | Metabolism          | Membrane              | -  | Up   | -    | -    |
| gi 258597233 | 60S ribosomal protein L36                                           | 12779   | 11.07 | 33  | 17   | Q8I713_PLAF7  | Translation         | Cytoplasm             | -  | -    | Down | -    |
| gi 124803477 | uncharacterized protein PF3D7_1104400                               | 49235   | 9.18  | 37  | 21   | Q8IIV8_PLAF7  | Unknown             | Endoplasmic Reticulum | -  | -    | -    | -    |
| gi 23505091  | DnaJ protein, putative                                              | 43233   | 8.81  | 59  | 28.1 | Q8I2W2_PLAF7  | Unknown             | Membrane              | -  | Up   | -    | -    |
| gi 6562734   | replication protein A1, large subunit                               | 134118  | 6.58  | 30  | 14.2 | O9U0J0_PLAF7  | DNA Replication     | Unknown               | -  | -    | Up   | -    |
| gi 124802200 | PRE-binding protein                                                 | 131545  | 9.19  | 30  | 14.3 | Q8IJ57_PLAF7  | Transcription       | Nucleus               | -  | Up   | Up   | Up   |
| gi 124806691 | erythrocyte membrane protein 1, PfEMP1                              | 261440  | 5.15  | 22  | 12.8 | Q8IS19_PLAF7  | Pathogenesis        | Membrane              | -  | -    | Down | -    |
| gi 6562724   | sporozoite invasion-associated protein 1                            | 112862  | 6.27  | 24  | 13.7 | Q9U0K0_PLAF7  | Unknown             | Unknown               | -  | Up   | -    | -    |
| gi 258597681 | conserved protein, unknown function                                 | 49106   | 9.61  | 21  | 10.1 | Q8IIT3_PLAF7  | Unknown             | Unknown               | -  | -    | Down | -    |
| gi 225632022 | phosphatidylinositol transfer protein, putative                     | 220966  | 5.88  | 20  | 14.1 | Q8IDJ9_PLAF7  | Unknown             | Cytoplasm             | -  | Down | -    | -    |
| gi 225631642 | conserved Plasmodium protein, unknown function                      | 821866  | 9.5   | 22  | 11.9 | C0H4B0_PLAF7  | Unknown             | Membrane              | -  | -    | Up   | -    |
| gi 23510631  | asparagine-rich antigen Pfa35-2                                     | 363848  | 6.47  | 25  | 11.7 | Q8I284_PLAF7  | Nucleosome Assembly | Cytoplasm             | -  | -    | Down | -    |
| gi 74862728  | RecName: Full=Pentatricopeptide repeat-containing protein PFL1605w  | 169454  | 7.95  | 24  | 12.3 | PPR1_PLAF7    | Unknown             | Cytoplasm             | -  | Down | -    | -    |
| gi 47168426  | Chain A, Uridine Phosphorylase, Putative                            | 30441   | 5.83  | 141 | 35.5 | Q8I3X4_PLAF7  | Metabolism          | Unknown               | -  | Down | -    | -    |
| gi 312208188 | Chain A, Endoplasmic homolog                                        | 32001   | 5.76  | 135 | 25.6 | Q8IOV4_PLAF7  | Protein fate        | Endoplasmic Reticulum | -  | Down | -    | -    |
| gi 284055700 | Chain A, Pyruvate kinase                                            | 56744   | 6.98  | 102 | 38.7 | C6KTA4_PLAF7  | Metabolism          | Cytoplasm             | -  | Down | -    | -    |
| gi 23505108  | inosine-5'-monophosphate dehydrogenase                              | 56115   | 7.99  | 63  | 34.1 | Q8I2U5_PLAF7  | Metabolism          | Cytoplasm             | -  | Down | Up   | -    |
| gi 1297293   | 60 kDa heat-shock protein PfHsp60                                   | 62125   | 7.05  | 49  | 32.6 | Q27723_PLAF7  | Protein fate        | Cytoplasm             | -  | Down | -    | -    |
| gi 23615562  | casein kinase II beta chain                                         | 45257   | 3.66  | 42  | 15.6 | Q8IDR5_PLAF7  | Unknown             | Cytoplasm             | -  | -    | Up   | -    |
| gi 124802989 | enhancer of rudimentary homolog, putative                           | 12313   | 8.65  | 38  | 29.5 | Q8IJ30_PLAF7  | Cell Cycle          | Unknown               | -  | Down | Up   | -    |
| gi 225631665 | conserved Plasmodium protein, unknown function                      | 469585  | 7.47  | 35  | 11.8 | C0H4C9_PLAF7  | Unknown             | Unknown               | -  | Down | -    | -    |
| gi 23615772  | conserved Plasmodium protein, unknown function                      | 386087  | 8.76  | 35  | 10.4 | Q8ID63_PLAF7  | Unknown             | Membrane              | -  | Down | -    | -    |

|              |                                                             |        |      |    |      |              |                 |              |   |      |      |      |
|--------------|-------------------------------------------------------------|--------|------|----|------|--------------|-----------------|--------------|---|------|------|------|
| gi 258596983 | conserved Plasmodium protein, unknown function              | 45596  | 7.12 | 32 | 23   | Q81X4_PLAF7  | Unknown         | Unknown      | - | Down | -    | -    |
| gi 23504660  | FACT complex subunit SPT16, putative                        | 132600 | 4.86 | 31 | 9.1  | Q813T4_PLAF7 | Transcription   | Nucleus      | - | Down | -    | -    |
| gi 46361188  | hexokinase                                                  | 55226  | 6.72 | 53 | 31.2 | C6KT76_PLAF7 | Metabolism      | Cytoplasm    | - | Down | Down | Down |
| gi 225631797 | AP-4 complex subunit epsilon, putative                      | 161304 | 5.44 | 29 | 14.5 | Q813A8_PLAF7 | Transport       | Cytoplasm    | - | Down | -    | -    |
| gi 152968490 | cyclic nucleotide-specific phosphodiesterase                | 97106  | 6.54 | 31 | 9.6  | Q8IKD3_PLAF7 | Metabolism      | Membrane     | - | -    | -    | -    |
| gi 124800762 | conserved Plasmodium protein, unknown function              | 83770  | 8.54 | 28 | 14.8 | O96141_PLAF7 | Unknown         | Unknown      | - | Down | -    | -    |
| gi 23615441  | conserved Plasmodium protein, unknown function              | 205350 | 9.22 | 28 | 12.9 | Q8IE35_PLAF7 | Unknown         | Unknown      | - | -    | -    | -    |
| gi 46362258  | conserved Plasmodium protein, unknown function              | 153622 | 8.47 | 27 | 17.5 | C6KSM6_PLAF7 | Unknown         | Unknown      | - | Down | -    | -    |
| gi 23505253  | ring-exported protein 1                                     | 82991  | 5.46 | 27 | 7.4  | Q8I2G1_PLAF7 | Unknown         | Cytoplasm    | - | Down | -    | -    |
| gi 23615272  | conserved Plasmodium protein, unknown function              | 277526 | 7.79 | 25 | 10.3 | Q8IEJ4_PLAF7 | Unknown         | Unknown      | - | Down | -    | -    |
| gi 124810495 | conserved protein, unknown function                         | 115321 | 8.18 | 25 | 14.9 | Q8IK86_PLAF7 | Unknown         | Cytoplasm    | - | Down | -    | -    |
| gi 124803955 | heat shock protein 90, putative                             | 108397 | 6.22 | 34 | 9.1  | Q8III6_PLAF7 | Protein fate    | Mitochondria | - | -    | -    | -    |
| gi 124809222 | cGMP-dependent protein kinase                               | 97632  | 5.4  | 24 | 15.4 | Q8I719_PLAF7 | Regulation      | Cytoplasm    | - | Down | -    | -    |
| gi 124810493 | conserved Plasmodium protein, unknown function              | 185792 | 9.12 | 24 | 15.5 | Q8IK87_PLAF7 | Unknown         | Unknown      | - | Down | -    | -    |
| gi 23498211  | conserved protein, unknown function                         | 27337  | 6.78 | 23 | 19.1 | Q811U2_PLAF7 | Unknown         | Unknown      | - | Down | -    | -    |
| gi 23498752  | conserved Plasmodium protein, unknown function              | 118270 | 8.1  | 23 | 9    | YPF13_PLAF7  | Unknown         | Unknown      | - | Down | Down | Down |
| gi 23504673  | mRNA-binding protein PUF1                                   | 223948 | 8.2  | 21 | 12.6 | Q8I3S3_PLAF7 | Translation     | Unknown      | - | Down | -    | -    |
| gi 225631658 | conserved Plasmodium protein, unknown function              | 46993  | 8.92 | 21 | 20.5 | C0H4C2_PLAF7 | Unknown         | Unknown      | - | Down | -    | -    |
| gi 23498891  | rhoptyr-associated leucine zipper-like protein 1            | 87825  | 5.31 | 27 | 19.4 | Q8IBN1_PLAF7 | Unknown         | Rhoptry      | - | Down | -    | -    |
| gi 23498854  | mitochondrial ribosomal protein S8 precursor, putative      | 14793  | 9.98 | 20 | 13.2 | Q8IBR7_PLAF7 | Translation     | Cytoplasm    | - | Down | -    | -    |
| gi 23505129  | 3-oxoacyl-[acyl-carrier-protein] reductase                  | 33326  | 9.33 | 20 | 15   | Q8I2S7_PLAF7 | Metabolism      | Unknown      | - | Down | -    | -    |
| gi 124809066 | conserved Plasmodium protein, unknown function              | 143906 | 8.94 | 20 | 11.2 | Q8ILD6_PLAF7 | Unknown         | Nucleus      | - | Down | -    | -    |
| gi 23615541  | ABC transporter B family member 5, putative                 | 108443 | 8.47 | 20 | 11.2 | Q8IDT6_PLAF7 | Unknown         | Membrane     | - | Down | -    | -    |
| gi 225632201 | inositol 5-phosphatase, putative                            | 172950 | 9.68 | 27 | 19.4 | C0H4Q9_PLAF7 | Unknown         | Membrane     | - | Down | -    | -    |
| gi 23615413  | conserved Plasmodium protein, unknown function              | 185578 | 7.09 | 20 | 12.3 | Q8IE62_PLAF7 | Unknown         | Unknown      | - | Down | -    | -    |
| gi 23499167  | RNA-binding protein (U1 snRNP-like), putative               | 27861  | 8.34 | 20 | 28.9 | RU1C_PLAF7   | Transcription   | Nucleus      | - | Down | -    | -    |
| gi 124805668 | porphobilinogen deaminase                                   | 50315  | 9.54 | 20 | 24.4 | Q8I5V3_PLAF7 | Metabolism      | Apicoplast   | - | Down | Up   | -    |
| gi 46361176  | leucine--tRNA ligase, putative                              | 170133 | 6.12 | 20 | 8.5  | C6KT64_PLAF7 | Translation     | Cytoplasm    | - | -    | -    | -    |
| gi 124802394 | conserved Plasmodium protein, unknown function              | 137321 | 9.36 | 20 | 11.2 | Q8IJM1_PLAF7 | Unknown         | Unknown      | - | Down | -    | -    |
| gi 124802282 | transcriptional coactivator ADA2                            | 300067 | 8.79 | 20 | 9.9  | Q8IJP9_PLAF7 | Transcription   | Nucleus      | - | Down | -    | -    |
| gi 124805693 | conserved Plasmodium protein, unknown function              | 24532  | 5.4  | 19 | 11.5 | Q8ISU6_PLAF7 | Unknown         | Unknown      | - | Down | -    | -    |
| gi 124801201 | conserved Plasmodium membrane protein, unknown function     | 493899 | 8.46 | 19 | 9.1  | O96204_PLAF7 | Unknown         | Unknown      | - | Down | -    | -    |
| gi 23498892  | ubiquitin carboxyl-terminal hydrolase, putative             | 145399 | 8.9  | 19 | 13.5 | Q8IBN0_PLAF7 | Protein fate    | Cytoplasm    | - | Down | -    | -    |
| gi 124808290 | conserved Plasmodium protein, unknown function              | 39806  | 8.57 | 18 | 16.2 | Q8ILY8_PLAF7 | Unknown         | Unknown      | - | Down | -    | -    |
| gi 124804142 | leucine-rich repeat protein                                 | 93275  | 8.97 | 18 | 13.9 | Q8IID1_PLAF7 | Unknown         | Unknown      | - | Down | Down | Down |
| gi 225631849 | conserved Plasmodium protein, unknown function              | 102515 | 8.83 | 18 | 11.7 | C0H567_PLAF7 | Unknown         | Unknown      | - | Down | Down | Down |
| gi 258597363 | 3-oxo-5-alpha-steroid 4-dehydrogenase, putative             | 35445  | 9.53 | 18 | 5.4  | Q8II05_PLAF7 | Metabolism      | Cytoplasm    | - | Down | -    | -    |
| gi 23615204  | conserved Plasmodium protein, unknown function              | 160471 | 9.3  | 17 | 8.8  | Q8IEQ5_PLAF7 | Unknown         | Membrane     | - | Down | -    | -    |
| gi 258597491 | triose or hexose phosphate/phosphate translocator, putative | 54687  | 9.13 | 17 | 13.2 | Q8I5M4_PLAF7 | Transport       | Unknown      | - | Down | -    | -    |
| gi 225631826 | conserved Plasmodium protein, unknown function              | 205540 | 8.72 | 17 | 11.3 | C0H544_PLAF7 | Unknown         | Membrane     | - | Down | -    | -    |
| gi 124804710 | conserved Plasmodium protein, unknown function              | 219717 | 9.63 | 16 | 8.6  | Q8IHV9_PLAF7 | Unknown         | Unknown      | - | Down | -    | -    |
| gi 124802905 | merozoite surface protein 6                                 | 42250  | 4.32 | 18 | 13.2 | Q8IJ54_PLAF7 | Invasion        | Unknown      | - | -    | Up   | -    |
| gi 124806291 | RNA pseudouridylate synthase, putative                      | 48335  | 9.57 | 17 | 19.3 | Q8I5D3_PLAF7 | Metabolism      | Unknown      | - | Down | Up   | -    |
| gi 23498776  | Cg7 protein                                                 | 153379 | 6.98 | 15 | 13.9 | Q8IBZ5_PLAF7 | Unknown         | Unknown      | - | Down | -    | -    |
| gi 124808195 | DNA repair helicase, putative                               | 135460 | 8.96 | 18 | 22.2 | Q8IM12_PLAF7 | Metabolism      | Nucleus      | - | -    | -    | -    |
| gi 124807008 | osmiophilic body protein                                    | 377151 | 5.71 | 14 | 8.5  | Q8I4T3_PLAF7 | Unknown         | Cytoplasm    | - | Down | -    | -    |
| gi 23499027  | receptor for activated c kinase                             | 35664  | 6.24 | 62 | 15.2 | Q8IBA0_PLAF7 | Unknown         | Cytoplasm    | - | Up   | Down | -    |
| gi 124801080 | ATP-dependent RNA helicase UAP56                            | 52191  | 5.68 | 49 | 12   | Q9TY94_PLAF7 | Transcription   | Nucleus      | - | Up   | -    | -    |
| gi 225632223 | coatomer subunit epsilon, putative                          | 33071  | 4.59 | 44 | 14.7 | C0H4T1_PLAF7 | Transport       | Cytoplasm    | - | Up   | -    | -    |
| gi 23499022  | conserved Plasmodium protein, unknown function              | 100876 | 5.92 | 35 | 7.7  | Q8IBA5_PLAF7 | Unknown         | Unknown      | - | Up   | -    | -    |
| gi 46361219  | conserved protein, unknown function                         | 43622  | 7.19 | 33 | 19.9 | C6KTA3_PLAF7 | Unknown         | Unknown      | - | Up   | -    | -    |
| gi 124800772 | hexose transporter                                          | 56380  | 8.8  | 33 | 12.7 | Q7KWJ5_PLAF7 | Unknown         | Membrane     | - | Up   | -    | -    |
| gi 23505020  | conserved Plasmodium protein, unknown function              | 188566 | 9.15 | 34 | 15.6 | Q8I332_PLAF7 | Unknown         | Apicoplast   | - | Up   | Down | -    |
| gi 124801981 | 40S ribosomal protein S20e, putative                        | 13504  | 9.67 | 34 | 17.8 | Q8IK02_PLAF7 | Translation     | Cytoplasm    | - | Up   | -    | -    |
| gi 23499165  | conserved Plasmodium protein, unknown function              | 70662  | 9.11 | 30 | 4.8  | Q8IAW5_PLAF7 | Unknown         | Cytoplasm    | - | Up   | -    | -    |
| gi 124808563 | H/ACA ribonucleoprotein complex subunit 4, putative         | 52908  | 9.06 | 27 | 14.6 | Q8ILS0_PLAF7 | Metabolism      | Cytoplasm    | - | Up   | -    | -    |
| gi 225632241 | ATPase, putative                                            | 139581 | 8.66 | 27 | 9.8  | Q8IAX9_PLAF7 | Unknown         | Unknown      | - | Up   | -    | -    |
| gi 258597683 | conserved Plasmodium protein, unknown function              | 77169  | 8.98 | 27 | 22.6 | Q8ILT2_PLAF7 | Unknown         | Unknown      | - | Up   | -    | -    |
| gi 23615185  | DNA ligase I                                                | 104440 | 7.66 | 27 | 10.3 | Q8IES4_PLAF7 | DNA Replication | Nucleus      | - | Up   | -    | -    |
| gi 258597895 | conserved Plasmodium membrane protein, unknown function     | 388575 | 8.84 | 25 | 12.3 | Q8IKJ2_PLAF7 | Unknown         | Membrane     | - | Up   | -    | -    |
| gi 225632177 | conserved Plasmodium protein, unknown function              | 420410 | 8.7  | 25 | 12   | C0H4P2_PLAF7 | Unknown         | Unknown      | - | Up   | -    | -    |
| gi 258597178 | Pfmc-2TM Maurer's cleft two transmembrane protein           | 27162  | 9.36 | 25 | 22.5 | Q8IIY8_PLAF7 | Transport       | Membrane     | - | Up   | -    | -    |
| gi 160736    | vacuolar ATPase                                             | 68532  | 5.51 | 24 | 20.6 | VATA_PLAFA   | Metabolism      | Cytoplasm    | - | Up   | -    | -    |
| gi 124809489 | poly(A)-specific ribonuclease PARN, putative                | 102192 | 7.72 | 24 | 15.5 | Q8IL36_PLAF7 | Unknown         | Unknown      | - | Up   | -    | -    |
| gi 46361184  | transcription or splicing factor-like protein, putative     | 70382  | 5.75 | 24 | 8.8  | C6KT72_PLAF7 | Transcription   | Unknown      | - | Up   | -    | -    |
| gi 1373027   | apical membrane antigen-1, partial                          | 68829  | 5.23 | 24 | 15.6 | Q7JPC6_PLAFA | Pathogenesis    | Membrane     | - | Up   | -    | -    |



|              |                                                               |        |       |     |      |                  |                     |                       |   |    |      |    |
|--------------|---------------------------------------------------------------|--------|-------|-----|------|------------------|---------------------|-----------------------|---|----|------|----|
| gi 124810469 | splicing factor 3A subunit 1, putative                        | 83698  | 5.27  | 23  | 3.1  | Q8IK93_PLAF7     | Transcription       | Nucleus               | - | Up | -    | -  |
| gi 23505236  | TFIIH basal transcription factor complex helicase XPD subunit | 122760 | 5.94  | 22  | 15.8 | Q8I2H7_PLAF7     | DNA Replication     | Cytoplasm             | - | Up | -    | -  |
| gi 124808162 | conserved Plasmodium protein, unknown function                | 240981 | 9.51  | 36  | 13   | Q8IM18_PLAF7     | Unknown             | Unknown               | - | Up | Up   | Up |
| gi 23505235  | histidine--tRNA ligase, putative                              | 78134  | 9.51  | 22  | 16.7 | Q8I2H8_PLAF7     | Unknown             | Cytoplasm             | - | Up | -    | -  |
| gi 258597547 | aspartyl protease, putative                                   | 77044  | 7.79  | 21  | 12   | Q8I578_PLAF7     | Metabolism          | Food Vacuole          | - | Up | -    | -  |
| gi 23505153  | proline--tRNA ligase, putative                                | 68423  | 9.33  | 21  | 10.4 | Q8I2Q5_PLAF7     | Translation         | Unknown               | - | Up | -    | -  |
| gi 23615369  | conserved Plasmodium membrane protein, unknown function       | 404731 | 8.76  | 21  | 14.6 | Q8IEA1_PLAF7     | Unknown             | Membrane              | - | Up | Up   | Up |
| gi 23498252  | regulator of chromosome condensation, putative                | 236211 | 9.23  | 21  | 9.2  | Q8I1Q1_PLAF7     | Unknown             | Unknown               | - | Up | Up   | Up |
| gi 23615188  | conserved Plasmodium protein, unknown function                | 72454  | 6.55  | 20  | 5.1  | Q8IES1_PLAF7     | Unknown             | Unknown               | - | Up | -    | -  |
| gi 225631931 | condensin complex subunit 2, putative                         | 119143 | 4.87  | 20  | 15.3 | C0H598_PLAF7     | Cell Cycle          | Nucleus               | - | Up | -    | -  |
| gi 23499100  | perforin-like protein 4                                       | 76298  | 8.61  | 20  | 18.7 | Q8IB29_PLAF7     | Unknown             | Membrane              | - | Up | -    | -  |
| gi 23505203  | peptidyl-prolyl cis-trans isomerase                           | 72507  | 9.11  | 25  | 15.8 | Q8I2K8_PLAF7     | Protein fate        | Nucleus               | - | Up | Up   | Up |
| gi 124806649 | protein kinase 2                                              | 58876  | 8.77  | 18  | 35.6 | Q8I534_PLAF7     | Protein Signaling   | Cytoplasm             | - | Up | -    | -  |
| gi 124809797 | RAP protein, putative                                         | 208094 | 9.38  | 18  | 7.4  | Q8IKU2_PLAF7     | Unknown             | Unknown               | - | Up | -    | -  |
| gi 225632270 | histone acetyltransferase GCN5                                | 170810 | 6.25  | 18  | 10.3 | Q8IB67_PLAF7     | Nucleosome Assembly | Nucleus               | - | Up | -    | -  |
| gi 23504560  | subtilisin-like protease 1                                    | 77598  | 5.68  | 18  | 12.6 | Q8IOV0_PLAF7     | Protein fate        | Cytoplasm             | - | Up | -    | -  |
| gi 23615425  | myosin C                                                      | 250131 | 8.84  | 18  | 11   | Q8IE50_PLAF7     | Cytoskeleton        | Cytoplasm             | - | Up | -    | -  |
| gi 15375380  | P-loop containing nucleoside triphosphate hydrolase, putative | 132116 | 5.07  | 17  | 13.2 | O97242_PLAF7     | Metabolism          | Unknown               | - | Up | -    | -  |
| gi 258597726 | conserved Plasmodium protein, unknown function                | 248348 | 9.01  | 30  | 10.2 | Q8IJL6_PLAF7     | Unknown             | Unknown               | - | Up | Up   | Up |
| gi 23505002  | conserved Plasmodium protein, unknown function                | 368118 | 5.27  | 16  | 10.9 | Q8I350_PLAF7     | Unknown             | Unknown               | - | Up | Down | -  |
| gi 23498863  | conserved Plasmodium protein, unknown function                | 205848 | 9.17  | 16  | 7.5  | Q8IBQ8_PLAF7     | Unknown             | Membrane              | - | Up | -    | -  |
| gi 23498942  | conserved Plasmodium protein, unknown function                | 114757 | 9.19  | 16  | 3.6  | Q8IBI0_PLAF7     | Unknown             | Unknown               | - | Up | -    | -  |
| gi 124806958 | conserved Plasmodium membrane protein, unknown function       | 81491  | 9.45  | 14  | 10.6 | Q8I4U4_PLAF7     | Unknown             | Unknown               | - | Up | -    | -  |
| gi 124801397 | 40S ribosomal protein S26                                     | 12501  | 10.98 | 37  | 29   | O96258_PLAF7     | Translation         | Cytoplasm             | - | -  | Down | -  |
| gi 15375385  | glutaredoxin 1                                                | 12410  | 7.68  | 62  | 42.3 | Q9NLB2_PLAF7     | Cell Rescue Defense | Cytoplasm             | - | -  | Up   | -  |
| gi 258597165 | antigen UB05                                                  | 13703  | 9.44  | 28  | 20.2 | Q8IJ28_PLAF7     | Unknown             | Unknown               | - | -  | Up   | -  |
| gi 23504580  | RNA polymerase I                                              | 340462 | 5.75  | 30  | 12.1 | Q8I410_PLAF7     | Transcription       | Nucleus               | - | -  | -    | -  |
| gi 296004752 | erythrocyte membrane protein 1, PFEMP1                        | 255615 | 5.41  | 32  | 15.4 | AOA143ZY8_PLAF7  | Pathogenesis        | Membrane              | - | -  | Up   | -  |
| gi 124801175 | tyrosine kinase-like protein, putative                        | 148133 | 9.57  | 18  | 10   | O96197_PLAF7     | Protein Signaling   | Cytoplasm             | - | -  | Down | -  |
| gi 124809914 | V-type H(+)-translocating pyrophosphatase, putative           | 76367  | 6.14  | 100 | 12.3 | Q8IKR1_PLAF7     | Regulation          | Membrane              | - | -  | -    | -  |
| gi 124804821 | 40S ribosomal protein S26                                     | 9140   | 8.66  | 73  | 43.9 | Q8IH55_PLAF7     | Translation         | Cytoplasm             | - | -  | Up   | -  |
| gi 225632186 | signal recognition particle subunit SRP9                      | 12127  | 9.45  | 65  | 59.2 | C0H4Q0_PLAF7     | Translation         | Cytoplasm             | - | -  | -    | -  |
| gi 23504624  | ras-related protein Rab-1A                                    | 23844  | 6.89  | 47  | 33.3 | Q8I3W9_PLAF7     | Unknown             | Endoplasmic Reticulum | - | -  | Down | -  |
| gi 124805527 | conserved Plasmodium protein, unknown function                | 38994  | 4.84  | 45  | 12   | Q8ISY9_PLAF7     | Unknown             | Unknown               | - | -  | Down | -  |
| gi 67463796  | Chain A, Deoxyuridine 5~-triphosphate Nucleotidohydrolase     | 19561  | 6.53  | 44  | 17.3 | Q8II92_PLAF7     | DNA Replication     | Unknown               | - | -  | -    | -  |
| gi 23476987  | glycogen synthase kinase 3                                    | 51583  | 5.4   | 38  | 21.1 | O77344_PLAF7     | Unknown             | Membrane              | - | -  | Down | -  |
| gi 258597173 | Pfmc-2TM Maurer's cleft two transmembrane protein             | 27356  | 9.63  | 34  | 26   | Q8IU11_PLAF7     | Transport           | Membrane              | - | -  | Down | -  |
| gi 224591381 | Pfmc-2TM Maurer's cleft two transmembrane protein             | 26882  | 9.71  | 34  | 28.4 | B9Z5J3_PLAF7     | Transport           | Membrane              | - | -  | Down | -  |
| gi 23504959  | conserved Plasmodium protein, unknown function                | 139901 | 8.75  | 34  | 11.7 | Q8I391_PLAF7     | Unknown             | Nucleus               | - | -  | Down | -  |
| gi 258597261 | pyridoxine biosynthesis protein PDX2                          | 24547  | 6.43  | 34  | 18.7 | AOA144A0A4_PLAF7 | Unknown             | Unknown               | - | -  | Down | -  |
| gi 23505080  | glideosome-associated protein 50                              | 44576  | 8.69  | 42  | 16.9 | Q8I2X3_PLAF7     | Unknown             | Membrane              | - | -  | Up   | -  |
| gi 23505011  | conserved Plasmodium protein, unknown function                | 137031 | 9     | 33  | 12.2 | Q8I341_PLAF7     | Unknown             | Unknown               | - | -  | Down | -  |
| gi 74873111  | RecName: Full=Uncharacterized protein PFB0145c                | 237599 | 5.77  | 33  | 16.4 | YB145_PLAF7      | Unknown             | Cytoplasm             | - | -  | Down | -  |
| gi 124805363 | Plasmodium exported protein (PHISTb), unknown function        | 77069  | 4.4   | 27  | 6.3  | Q8I635_PLAF7     | Unknown             | Unknown               | - | -  | Down | -  |
| gi 23498201  | phosphoglucomutase-2                                          | 35210  | 9.52  | 27  | 16.3 | Q8I1V2_PLAF7     | Metabolism          | Membrane              | - | -  | Down | -  |
| gi 23615683  | serine/threonine protein phosphatase 5                        | 76840  | 5.06  | 25  | 13.5 | Q8IDE7_PLAF7     | Unknown             | Unknown               | - | -  | Down | -  |
| gi 7672216   | phosphatidylinositol 3-and 4-kinase, putative                 | 110490 | 6.16  | 25  | 15.2 | O77353_PLAF7     | Unknown             | Unknown               | - | -  | Down | -  |
| gi 124806008 | cell cycle associated protein, putative                       | 323873 | 9.26  | 23  | 11.1 | Q8I5L0_PLAF7     | Unknown             | Unknown               | - | -  | Down | -  |
| gi 124810087 | conserved Plasmodium protein, unknown function                | 59322  | 5.28  | 23  | 23   | Q8IKM2_PLAF7     | Unknown             | Unknown               | - | -  | Down | -  |
| gi 23615547  | RNA lariat debranching enzyme, putative                       | 67513  | 5.21  | 23  | 9.9  | Q8IDT0_PLAF7     | Transcription       | Nucleus               | - | -  | Down | -  |
| gi 124802645 | conserved Plasmodium protein, unknown function                | 196369 | 9.26  | 23  | 9.6  | Q8IUD6_PLAF7     | Unknown             | Unknown               | - | -  | Down | -  |
| gi 23498929  | DNA mismatch repair protein PMS1, putative                    | 156741 | 5.48  | 22  | 6.4  | Q8IBJ3_PLAF7     | DNA Replication     | Cytoplasm             | - | -  | Down | -  |
| gi 23615502  | conserved Plasmodium protein, unknown function                | 48840  | 9     | 21  | 4.9  | Q8IDX4_PLAF7     | Unknown             | Unknown               | - | -  | Down | -  |
| gi 124809814 | serine/threonine protein kinase KIN                           | 90798  | 9.7   | 20  | 8.6  | Q8IKT6_PLAF7     | Protein Signaling   | Cytoplasm             | - | -  | Down | -  |
| gi 7672215   | pre-mRNA splicing factor, putative                            | 71621  | 10.01 | 20  | 2.2  | O77355_PLAF7     | Transcription       | Unknown               | - | -  | Down | -  |
| gi 33413784  | normocyte binding protein 2b                                  | 382646 | 5.18  | 20  | 11.7 | Q9BK45_PLAFA     | Unknown             | Membrane              | - | -  | Down | -  |
| gi 23615500  | reticulocyte binding protein 2 homologue a                    | 370208 | 5.44  | 20  | 12.2 | RBP2A_PLAF7      | Cell Surface        | Membrane              | - | -  | Down | -  |
| gi 124806068 | uncharacterized protein PF3D7_1222000                         | 65650  | 9.23  | 19  | 10.5 | Q8I5J3_PLAF7     | Unknown             | Unknown               | - | -  | Down | -  |
| gi 258597555 | clustered-asparagine-rich protein                             | 51501  | 8.71  | 18  | 8.1  | Q8I562_PLAF7     | Unknown             | Unknown               | - | -  | Down | -  |
| gi 124806250 | conserved Plasmodium protein, unknown function                | 140933 | 9.27  | 18  | 9.6  | Q8I5E5_PLAF7     | Unknown             | Unknown               | - | -  | Down | -  |
| gi 3894094   | mitogen-activated protein kinase 2                            | 59173  | 8.63  | 18  | 9.8  | Q7KQK7_PLAF7     | Protein Signaling   | Cytoplasm             | - | -  | Down | -  |
| gi 23504897  | Plasmodium exported protein (PHISTb), unknown function        | 60150  | 4.93  | 18  | 18.3 | Q8I3F1_PLAF7     | Unknown             | Unknown               | - | -  | Down | -  |
| gi 3764023   | parasite-infected erythrocyte surface protein                 | 153993 | 5.14  | 18  | 7.6  | O77361_PLAF7     | Unknown             | Membrane              | - | -  | Down | -  |
| gi 124809929 | conserved Plasmodium protein, unknown function                | 88742  | 6.56  | 18  | 19.1 | Q8IKQ8_PLAF7     | Unknown             | Unknown               | - | -  | Down | -  |
| gi 23498197  | erythrocyte membrane protein 1, PFEMP1                        | 263576 | 5.25  | 18  | 10.4 | Q8I1V6_PLAF7     | Pathogenesis        | Membrane              | - | -  | Down | -  |
| gi 23498196  | erythrocyte membrane protein 1, PFEMP1                        | 261684 | 5.28  | 18  | 10.3 | Q8I1V7_PLAF7     | Pathogenesis        | Membrane              | - | -  | Down | -  |
| gi 23504939  | LCCL domain-containing protein                                | 178224 | 8.81  | 18  | 11.4 | Q8I3B1_PLAF7     | Unknown             | Cytoplasm             | - | -  | Down | -  |
| gi 74930170  | RecName: Full=Actin-2; AltName: Full=Actin II                 | 42578  | 5.21  | 17  | 18.6 | ACT2_PLAF7       | Cytoskeleton        | Cytoplasm             | - | -  | Down | -  |
| gi 124808338 | conserved protein, unknown function                           | 81048  | 8.6   | 17  | 6.9  | Q8ILX8_PLAF7     | Unknown             | Nucleus               | - | -  | Down | -  |
| gi 23498172  | ag-1 blood stage membrane protein homologue                   | 69060  | 5.47  | 17  | 9.8  | Q8I1X7_PLAF7     | Unknown             | Unknown               | - | -  | Down | -  |

|              |                                                                       |        |       |     |      |              |                     |                       |   |   |      |   |
|--------------|-----------------------------------------------------------------------|--------|-------|-----|------|--------------|---------------------|-----------------------|---|---|------|---|
| gi 23615614  | conserved Plasmodium membrane protein, unknown function               | 460569 | 7.48  | 17  | 10.8 | Q8IDL5_PLAF7 | Unknown             | Membrane              | - | - | Down | - |
| gi 4493884   | inner membrane complex protein 1e, putative                           | 61726  | 6.63  | 16  | 18.1 | O97229_PLAF7 | Unknown             | Membrane              | - | - | Down | - |
| gi 124804913 | tubulin--tyrosine ligase, putative                                    | 325121 | 9.25  | 15  | 13.9 | Q8IHP8_PLAF7 | Metabolism          | Unknown               | - | - | Down | - |
| gi 23615797  | conserved Plasmodium protein, unknown function                        | 78525  | 9.38  | 15  | 9.9  | Y13P2_PLAF7  | Unknown             | Unknown               | - | - | Down | - |
| gi 124801837 | erythrocyte membrane protein 1, PfEMP1                                | 252173 | 5.26  | 15  | 15.6 | Q8IK37_PLAF7 | Pathogenesis        | Membrane              | - | - | Down | - |
| gi 124805350 | erythrocyte membrane protein 1, PfEMP1                                | 355019 | 7.25  | 15  | 13.3 | Q8I639_PLAF7 | Pathogenesis        | Membrane              | - | - | Down | - |
| gi 256032266 | Chain A, Erythrocyte Membrane Protein 1 (pfemp1)                      | 35553  | 8.3   | 15  | 31.1 | Q8I639_PLAF7 | Pathogenesis        | Membrane              | - | - | Down | - |
| gi 6138833   | Polyubiquitin                                                         | 42803  | 7     | 172 | 21   | Q7KQK2_PLAF7 | Protein fate        | Cytoplasm             | - | - | Up   | - |
| gi 285803543 | Chain A, M17 Leucyl Aminopeptidase                                    | 58604  | 6.38  | 57  | 23.3 | Q8IL11_PLAF7 | Unknown             | Cytoplasm             | - | - | Up   | - |
| gi 23504499  | skeleton-binding protein 1                                            | 36277  | 4.33  | 45  | 7.4  | Q8I487_PLAF7 | Translation         | Membrane              | - | - | Up   | - |
| gi 124802833 | haloacid dehalogenase-like hydrolase                                  | 32821  | 5.62  | 31  | 13.2 | Q8IJ74_PLAF7 | Regulation          | Cytoplasm             | - | - | Up   | - |
| gi 258597947 | conserved Plasmodium membrane protein, unknown function               | 64379  | 8.88  | 30  | 3    | Q8IKB5_PLAF7 | Unknown             | Unknown               | - | - | Up   | - |
| gi 124810280 | conserved Plasmodium protein, unknown function                        | 295648 | 5.19  | 30  | 8.1  | Q8IKF6_PLAF7 | Unknown             | Unknown               | - | - | Up   | - |
| gi 74873273  | RecName: Full=GRIP and coiled-coil domain-containing protein PFC0235w | 135640 | 4.87  | 30  | 14   | YGCC1_PLAF7  | Unknown             | Unknown               | - | - | Up   | - |
| gi 225632280 | conserved Plasmodium protein, unknown function                        | 88381  | 9.76  | 30  | 12.4 | C0H4Y1_PLAF7 | Unknown             | Unknown               | - | - | Up   | - |
| gi 23504941  | GTPase-activating protein, putative                                   | 50269  | 4.84  | 30  | 8.5  | Q8I3A9_PLAF7 | Unknown             | Unknown               | - | - | Up   | - |
| gi 225631662 | conserved Plasmodium membrane protein, unknown function               | 354955 | 5.17  | 29  | 9    | C0H4C6_PLAF7 | Unknown             | Membrane              | - | - | Up   | - |
| gi 225631719 | conserved Plasmodium protein, unknown function                        | 280186 | 5.04  | 29  | 12.5 | C6KSR4_PLAF7 | Unknown             | Cytoplasm             | - | - | Up   | - |
| gi 23615769  | 6-cysteine protein                                                    | 92669  | 6.49  | 41  | 14.3 | PF92_PLAF7   | Unknown             | Membrane              | - | - | Up   | - |
| gi 15383897  | conserved protein, unknown function                                   | 12885  | 10.19 | 29  | 12   | Q9NLA9_PLAF7 | Unknown             | Unknown               | - | - | Up   | - |
| gi 124804380 | 26S protease regulatory subunit 6A, putative                          | 49510  | 5.07  | 27  | 13.4 | Q8II60_PLAF7 | Transcription       | Cytoplasm             | - | - | Up   | - |
| gi 124805657 | U6 snRNA-associated Sm-like protein LSm7,putative                     | 11988  | 5.8   | 28  | 43.5 | Q8I5V6_PLAF7 | Transcription       | Nucleus               | - | - | Up   | - |
| gi 124809457 | conserved Plasmodium protein, unknown function                        | 300791 | 9.23  | 22  | 13.7 | Q8IL44_PLAF7 | Unknown             | Unknown               | - | - | Up   | - |
| gi 23615625  | conserved Plasmodium protein, unknown function                        | 405156 | 8.06  | 22  | 8.6  | Q8IDK4_PLAF7 | Unknown             | Membrane              | - | - | Up   | - |
| gi 258597814 | conserved Plasmodium protein, unknown function                        | 864485 | 8.74  | 21  | 8.4  | Q8IL30_PLAF7 | Unknown             | Unknown               | - | - | Up   | - |
| gi 258597897 | serine/threonine protein phosphatase UIS2,putative                    | 170374 | 5.51  | 21  | 14.8 | Q8IKJ1_PLAF7 | Unknown             | Unknown               | - | - | Up   | - |
| gi 23504667  | RAP protein, putative                                                 | 162718 | 7.96  | 21  | 7    | Q8I3S7_PLAF7 | Unknown             | Membrane              | - | - | Up   | - |
| gi 124804507 | protein disulfide isomerase                                           | 49164  | 8.94  | 19  | 11.1 | Q8II23_PLAF7 | Cell Rescue Defense | Endoplasmic Reticulum | - | - | Up   | - |
| gi 124806715 | conserved Plasmodium protein, unknown function                        | 63686  | 6.73  | 18  | 6.2  | Q8I509_PLAF7 | Unknown             | Membrane              | - | - | Up   | - |
| gi 23505270  | erythrocyte membrane protein 1, PfEMP1                                | 151890 | 5.66  | 18  | 13.2 | Q8I2E4_PLAF7 | Pathogenesis        | Membrane              | - | - | Up   | - |
| gi 124807182 | rifin                                                                 | 34492  | 8.89  | 18  | 12.7 | Q8I4P2_PLAF7 | Cell Surface        | Membrane              | - | - | Up   | - |
| gi 225632049 | conserved Plasmodium protein, unknown function                        | 144043 | 9.66  | 17  | 8.1  | C0H5K4_PLAF7 | Unknown             | Unknown               | - | - | Up   | - |
| gi 23615584  | rhomboid protease ROM6, putative                                      | 67822  | 9.73  | 17  | 4    | Q8IDP3_PLAF7 | Unknown             | Membrane              | - | - | Up   | - |
| gi 46362292  | conserved Plasmodium protein, unknown function                        | 123256 | 5.59  | 17  | 12.6 | C6KSQ8_PLAF7 | Unknown             | Unknown               | - | - | Up   | - |
| gi 23615696  | serine/threonine protein kinase, putative                             | 475422 | 8.99  | 17  | 13.6 | Q8IDD4_PLAF7 | Regulation          | Cytoplasm             | - | - | Up   | - |
| gi 124806489 | DNA polymerase epsilon subunit B, putative                            | 73584  | 6.02  | 17  | 8.2  | Q8I579_PLAF7 | DNA Replication     | Nucleus               | - | - | Up   | - |
| gi 46361213  | oxidoreductase, short-chain dehydrogenase family, putative            | 44730  | 9.39  | 16  | 23.5 | C6KT97_PLAF7 | Unknown             | Membrane              | - | - | Up   | - |
| gi 23498967  | transcription factor with AP2 domain(s)                               | 155036 | 4.95  | 16  | 12.3 | Q8IBF6_PLAF7 | Unknown             | Unknown               | - | - | Up   | - |
| gi 23615716  | CUGBP Elav-like family member 1                                       | 57079  | 5.43  | 15  | 6.1  | Q8IDB7_PLAF7 | Unknown             | Cytoplasm             | - | - | Up   | - |
| gi 23504871  | thioredoxin-like protein, putative                                    | 22041  | 9.16  | 15  | 9.8  | Q8I3H6_PLAF7 | Unknown             | Membrane              | - | - | Up   | - |
